# Supplementary material for: Are We In or Out of Conservation Units in Brazil? A Gap Analysis for the Conservation of Bats in Brazil
Source: Research Square preprint supplement (doi:10.21203/rs.3.rs-4004073/v1), 2024-03-14
Supplement: Supplementary file 1 [file 2da87bbefd87902a6f37c77d.xlsx]

## Sheet: Tabela S01
Family	Subfamily	Gender	Species with author	Trophic guild	IUCN classification	Point numbers
Emballonuridae	Emballonurinae	Centronycteris	Centronycteris maximiliani (J. Fischer, 1829)	Insetívoro Aéreo	LC	20
		Cormura	Cormura brevirostris (Wagner, 1843)	Insetívoro Aéreo	LC	112
		Cyttarops	Cyttarops alecto (Thomas, 1913)	Insetívoro Aéreo	LC	17
		Diclidurus	Diclidurus albus (Wied-Neuwied, 1820)	Insetívoro Aéreo	LC	65
			Diclidurus ingens (Hernández-Camacho, 1955)	Insetívoro Aéreo	DD	11
			Diclidurus isabella (Thomas, 1920)	Insetívoro Aéreo	LC	9
			Diclidurus scutatus (Peters, 1869)	Insetívoro Aéreo	LC	16
		Peropteryx	Peropteryx kappleri (Peters, 1867)	Insetívoro Aéreo	LC	70
			Peropteryx leucoptera (Peters, 1867)	Insetívoro Aéreo	LC	14
			Peropteryx macrotis (Wagner, 1843)	Insetívoro Aéreo	LC	289
			Peropteryx pallidoptera (Lim, Engstrom, Reid, Simmons, Voss and Fleck, 2010)	Insetívoro Aéreo	DD	1
			Peropteryx trinitatis (Miller, 1899)	Insetívoro Aéreo	DD	27
		Rhynchonycteris	Rhynchonycteris naso (Wied-Neuwied, 1820)	Insetívoro Aéreo	LC	654
		Saccopteryx	Saccopteryx bilineata (Temminck, 1838)	Insetívoro Aéreo	LC	798
			Saccopteryx canescens Thomas, 1901	Insetívoro Aéreo	LC	67
			Saccopteryx gymnura (Thomas, 1901)	Insetívoro Aéreo	DD	6
			Saccopteryx leptura (Schreber, 1774)	Insetívoro Aéreo	LC	262
Furipteridae		Furipterus	Furipterus horrens (F. Cuvier, 1828)	Insetívoro Aéreo	LC	42
Molossidae	Molossinae	Cynomops	Cynomops abrasus (Temminck, 1827)	Insetívoro Aéreo	DD	63
			Cynomops greenhalli (Goodwin, 1958)	Insetívoro Aéreo	LC	23
			Cynomops mastivus (Thomas, 1911)	Insetívoro Aéreo	DD	20
			Cynomops milleri (Osgood, 1914)	Insetívoro Aéreo	LC	19
			Cynomops planirostris (Peters, 1866)	Insetívoro Aéreo	LC	90
		Eumops	Eumops auripendulus (Shaw, 1800)	Insetívoro Aéreo	LC	100
			Eumops bonariensis (Peters, 1874)	Insetívoro Aéreo	LC	93
			Eumops chimaera (Gregorin, Moras, Acosta, Vasconcellos, Poma, dos Santos & Paca, 2016)	Insetívoro Aéreo	0	3
			Eumops dabbenei (Thomas, 1914)	Insetívoro	LC	8
			Eumops delticus (Thomas, 1923)	Insetívoro	DD	11
			Eumops glaucinus (Wagner, 1843)	Insetívoro	LC	145
			Eumops hansae (Sanborn, 1932)	Insetívoro	LC	28
			Eumops maurus (Thomas, 1901)	Insetívoro	DD	16
			Eumops patagonicus (Thomas, 1924)	Insetívoro	LC	44
			Eumops perotis (Schinz, 1821)	Insetívoro Aéreo	LC	92
			Eumops trumbulli (Thomas, 1901)	Insetívoro Aéreo	LC	12
		Molossops	Molossops neglectus (Williams and Genoways, 1980)	Insetívoro Aéreo	DD	14
			Molossops temminckii (Burmeister, 1854)	Insetívoro Aéreo	LC	138
		Molossus	Molossus aztecus (Saussure, 1860)	Insetívoro Aéreo	LC	25
			Molossus coibensis (J. A. Allen, 1904)	Insetívoro Aéreo	LC	48
			Molossus currentium (Thomas, 1901)	Insetívoro Aéreo	LC	65
			Molossus fluminensis (Lataste, 1891)	Insetívoro	0	1
			Molossus molossus (Pallas, 1766)	Insetívoro Aéreo (high-flyer)	LC	984
			Molossus pretiosus (Miller, 1902)	Insetívoro Aéreo	LC	46
			Molossus rufus (E. Geoffroy, 1805)	Insetívoro Aéreo (uncluttered space)	LC	700
		Neoplatymops	Neoplatymops mattogrossensis (Vieira, 1942)	Insetívoro Aéreo	LC	20
		Nyctinomops	Nyctinomops aurispinosus (Peale, 1848)	Insetívoro Aéreo	LC	58
			Nyctinomops laticaudatus (E. Geoffroy, 1805)	Insetívoro Aéreo	LC	173
			Nyctinomops macrotis (Gray, 1840)	Insetívoro Aéreo	LC	112
		Promops	Promops centralis (Thomas, 1915)	Insetívoro Aéreo	LC	83
			Promops nasutus (Spix, 1823)	Insetívoro Aéreo	LC	40
		Tadarida	Tadarida brasiliensis (I. Geoffroy, 1824)	Insetívoro Aéreo	LC	991
Mormoopidae		Pteronotus	Pteronotus alitonus (Pavan, Bobrowiec and Percequillo, 2018)	Insetívoro	0	29
			Pteronotus gymnonotus (Natterer, 1843)	Insetívoro	LC	62
			Pteronotus personatus (Wagner, 1843)	Insetívoro Aéreo	LC	278
			Pteronotus rubiginosus (Wagner, 1843)	Insetívoro Aéreo	LC	88
Natalidae		Natalus	Natalus macrourus (Ruschi, 1951)	Insetívoro Aéreo (high-flyer)	NT	9
Noctilionidae		Noctilio	Noctilio albiventris (Desmarest, 1818)	Insetívoro Aéreo	LC	305
			Noctilio leporinus (Linnaeus, 1758)	Carnivore	LC	467
Phyllostomidae	Carolliinae	Carollia	Carollia benkeithi (Solari and Baker, 2006)	Frugivore	LC	21
			Carollia brevicaudum (Schinz, 1821)	Frugivore	LC	1223
			Carollia perspicillata (Linnaeus, 1758)	Frugivore	LC	2062
	Desmodontinae	Desmodus	Desmodus rotundus (E. Geoffroy, 1810)	Hematophagous	LC	2231
		Diaemus	Diaemus youngii (Jentink, 1893)	Hematophagous	LC	81
		Diphylla	Diphylla ecaudata (Spix, 1823)	Hematophagous	LC	252
	Glossophaginae	Anoura	Anoura caudifer (E. Geoffroy, 1818)	Nectarivorous	LC	378
			Anoura geoffroyi (Peters, 1868)	Nectarivorous	LC	748
		Choeroniscus	Choeroniscus godmani (Thomas, 1903)	Nectarivorous	LC	114
			Choeroniscus minor (Peters, 1868)	Nectarivorous	LC	69
		Dryadonycteris	Dryadonycteris capixaba (Nogueira, Lima, Peracchi and Simmons, 2012)	Nectarivorous	DD	1
		Glossophaga	Glossophaga commissarisi (Gardner, 1962)	Nectarivorous	LC	420
			Glossophaga longirostris (Miller, 1898)	Frugivore	LC	227
			Glossophaga soricina (Pallas, 1766)	Nectarivorous	LC	2365
		Lichonycteris	Lichonycteris degener (Miller, 1931)	Nectarivorous	LC	1
		Scleronycteris	Scleronycteris ega (Thomas, 1912)	Frugivore	DD	3
		Xeronycteris	Xeronycteris vierai (Gregorin & Ditchfield, 2005)	Nectarivorous	0	3
	Glyphonycterinae	Glyphonycteris	Glyphonycteris behnii (Peters, 1865)	Omnivorous	DD	1
			Glyphonycteris daviesi (Hill, 1964)	Insectivore Gleaning	LC	17
			Glyphonycteris sylvestris (Thomas, 1896)	Insectivore Gleaning	LC	54
		Neonycteris	Neonycteris pusilla (Sanborn, 1949)	Omnivorous	DD	2
		Trinycteris	Trinycteris nicefori (Sanborn, 1949)	Insectivore Gleaning	LC	129
	Lonchophyllinae	Hsunycteris	Hsunycteris pattoni (Woodman and Timm, 2006)	Nectarivorous	DD	4
			Hsunycteris thomasi (J. A. Allen, 1904)	Nectarivorous	LC	201
		Lionycteris	Lionycteris spurrelli (Thomas, 1913)	Nectarivorous	LC	92
		Lonchophylla	Lonchophylla bokermanni (Sazima, Vizotto and Taddei, 1978)	Nectarivorous	EN	7
			Lonchophylla dekeyseri (Taddei, Vizotto and Sazima, 1983)	Nectarivorous	EN	6
			Lonchophylla inexpectata (Moratelli and Dias, 2015)	Nectarivorous	0	4
			Lonchophylla mordax (Thomas, 1903)	Nectarivorous	NT	23
			Lonchophylla peracchii (Dias, Esbérard and Moratelli, 2013)	Nectarivorous	LC	8
	Lonchorhininae	Lonchorhina	Lonchorhina aurita (Tomes, 1863)	Insetívoro Aéreo	LC	166
			Lonchorhina inusitata (Handley and Ochoa, 1997)	Insectivore Gleaning	DD	14
	Micronycterinae	Lampronycteris	Lampronycteris brachyotis (Dobson, 1879)	Insectivore Gleaning	LC	79
		Micronycteris	Micronycteris hirsuta (Peters, 1869)	Insectivore Gleaning	LC	73
			Micronycteris megalotis (Gray, 1842)	Insectivore Gleaning	LC	429
			Micronycteris microtis (Miller, 1898)	Insectivore Gleaning	LC	341
			Micronycteris minuta (Gervais, 1856)	Insectivore Gleaning	LC	159
			Micronycteris sanborni (Simmons, 1996)	Insectivore Gleaning	LC	27
			Micronycteris schmidtorum (Sanborn, 1935)	Insectivore Gleaning	LC	71
	Phyllostominae	Chrotopterus	Chrotopterus auritus (Peters, 1856)	Carnivore	LC	239
		Gardnerycteris	Gardnerycteris crenulatum (E. Geoffroy, 1803)	Frugivore	LC	250
		Lophostoma	Lophostoma brasiliense (Peters, 1867)	Insectivore Gleaning	LC	135
			Lophostoma carrikeri (J. A. Allen, 1910)	Omnivorous	LC	24
			Lophostoma schulzi (Genoways and Williams, 1980)	Insetívoro	LC	19
			Lophostoma silvicola (d'Orbigny, 1836)	Insectivore Gleaning	LC	276
		Macrophyllum	Macrophyllum macrophyllum (Schinz, 1821)	Nectarivorous	LC	104
		Mimon	Mimon bennettii (Gray, 1838)	Insectivore Gleaning	LC	100
		Phylloderma	Phylloderma stenops (Peters, 1865)	Insectivore Gleaning	LC	120
		Phyllostomus	Phyllostomus discolor (Wagner, 1843)	Omnivorous	LC	578
			Phyllostomus elongatus (E. Geoffroy, 1810)	Omnivorous	LC	241
			Phyllostomus hastatus (Pallas, 1767)	Omnivorous	LC	615
			Phyllostomus latifolius (Thomas, 1901)	Frugivore	LC	23
		Tonatia	Tonatia bidens (Spix, 1823)	Insectivore Gleaning	DD	88
			Tonatia maresi (Williams, Willig and Reid, 1995)	Insetívoro	0	1
		Trachops	Trachops cirrhosus (Spix, 1823)	Insectivore Gleaning	LC	445
		Vampyrum	Vampyrum spectrum (Linnaeus, 1758)	Carnivore	NT	88
	Rhinophyllinae	Rhinophylla	Rhinophylla fischerae (Carter, 1966)	Frugivore	LC	92
			Rhinophylla pumilio (Peters, 1865)	Frugivore	LC	274
	Stenodermatinae	Ametrida	Ametrida centurio (Gray, 1847)	Frugivore	LC	88
		Artibeus	Artibeus anderseni (Osgood, 1916)	Frugivore	LC	179
			Artibeus bogotensis (K. Andersen, 1906)	Frugivore	LC	69
			Artibeus cinereus (Gervais, 1856)	Frugivore	LC	318
			Artibeus concolor (Peters, 1865)	Frugivore	LC	82
			Artibeus fimbriatus (Gray, 1838)	Frugivore	LC	80
			Artibeus gnomus (Handley, 1987)	Frugivore	LC	139
			Artibeus lituratus (Olfers, 1818)	Frugivore	LC	2360
			Artibeus obscurus (Schinz, 1821)	Frugivore	LC	454
			Artibeus planirostris (Spix, 1823)	Frugivore	LC	671
		Chiroderma	Chiroderma doriae (Thomas, 1891)	Frugivore	LC	33
			Chiroderma trinitatum (Goodwin, 1958)	Frugivore	LC	148
			Chiroderma villosum (Peters, 1860)	Frugivore	LC	410
		Mesophylla	Mesophylla macconnelli (Thomas, 1901)	Frugivore	LC	234
		Platyrrhinus	Platyrrhinus angustirostris (Velazco, Gardner and Patterson, 2010)	Frugivore	LC	28
			Platyrrhinus aurarius (Handley and Ferris, 1972)	Frugivore	LC	18
			Platyrrhinus brachycephalus (Rouk and Carter, 1972)	Frugivore	LC	136
			Platyrrhinus fusciventris (Velazco, Gardner and Patterson, 2010)	Frugivore	LC	34
			Platyrrhinus incarum (Thomas, 1912)	Frugivore	LC	46
			Platyrrhinus infuscus (Peters, 1880)	Frugivore	LC	116
			Platyrrhinus lineatus (E. Geoffroy, 1810)	Frugivore	LC	261
			Platyrrhinus recifinus (Thomas, 1901)	Frugivore	LC	27
		Pygoderma	Pygoderma bilabiatum (Wagner, 1843)	Frugivore	LC	72
		Sphaeronycteris	Sphaeronycteris toxophyllum (Peters, 1882)	Frugivore	LC	70
		Sturnira	Sturnira giannae (Velazco and Patterson, 2019)	Frugivore	0	54
			Sturnira lilium (E. Geoffroy, 1810)	Frugivore	LC	1385
			Sturnira magna (de la Torre, 1966)	Frugivore	LC	75
			Sturnira tildae (de la Torre, 1959)	Frugivore	LC	229
		Uroderma	Uroderma bilobatum (Peters, 1866)	Frugivore	LC	841
			Uroderma magnirostrum (Davis, 1968)	Frugivore	LC	212
		Vampyressa	Vampyressa pusilla (Wagner, 1843)	Frugivore	DD	184
			Vampyressa thyone (Thomas, 1909)	Frugivore	LC	195
		Vampyriscus	Vampyriscus bidens (Dobson, 1878)	Frugivore	LC	120
			Vampyriscus brocki (Peterson, 1968)	Frugivore	LC	21
		Vampyrodes	Vampyrodes caraccioli (Thomas, 1889)	Frugivore	LC	129
Thyropteridae		Thyroptera	Thyroptera devivoi (Gregorin, Goncalves, Lim and Engstrom, 2006)	Insetívoro	DD	10
			Thyroptera discifera (Lichtenstein and Peters, 1855)	Insetívoro Aéreo	LC	22
			Thyroptera lavali (Pine, 1993)	Insetívoro Aéreo	DD	22
			Thyroptera tricolor (Spix, 1823)	Insetívoro Aéreo	LC	120
			Thyroptera wynneae (Velazco, Gregorin, Voss and Simmons, 2014)	Insetívoro Aéreo	DD	10
Vespertilionidae	Vespertilioninae	Aeorestes	Aeorestes egregius (Peters, 1870)	Insetívoro aéreo	DD	9
			Aeorestes villosissimus (E. Geoffroy, 1806)	Insetívoro	LC	22
		Dasypterus	Dasypterus ega (Gervais, 1856)	Insetívoro Aéreo	LC	305
		Eptesicus	Eptesicus brasiliensis (Desmarest, 1819)	Insetívoro Aéreo	LC	208
			Eptesicus chiriquinus (Thomas, 1920)	Insetívoro Aéreo	LC	33
			Eptesicus diminutus (Osgood, 1915)	Insetívoro	LC	48
			Eptesicus furinalis (d'Orbigny, 1847)	Insetívoro Aéreo	LC	405
			Eptesicus taddeii (Miranda, Bernardi and Passos, 2006)	Insetívoro	DD	1
		Histiotus	Histiotus alienus (Thomas, 1916)	Insetívoro	DD	2
			Histiotus diaphanopterus (Feijó, Da Rocha and Althoff, 2015)	Insetívoro	0	8
			Histiotus laephotis (Thomas, 1916)	Insetívoro Aéreo	LC	7
			Histiotus montanus (Philippi and Landbeck, 1861)	Insetívoro Aéreo	LC	118
			Histiotus velatus (I. Geoffroy, 1824)	Insetívoro Aéreo	DD	50
		Lasiurus	Lasiurus blossevillii (Lesson and Garnot, 1826)	Insetívoro	LC	290
			Lasiurus castaneus (Handley, 1960)	Insetívoro	DD	5
			Lasiurus ebenus (Fazzolari-Corrêa, 1994)	Insetívoro Aéreo	DD	1
		Rhogeessa	Rhogeessa hussoni (Genoways and Baker, 1996)	Insetívoro	DD	14
			Rhogeessa io (Thomas, 1903)	Insetívoro	LC	38
	Myotinae	Myotis	Myotis albescens (E. Geoffroy, 1806)	Insetívoro	LC	246
			Myotis izecksohni (Moratelli, Peracchi, Dias and de Oliveira, 2011)	Insetívoro	DD	1
			Myotis lavali (Moratelli, Peracchi, Dias and de Oliveira, 2011)	Insetívoro	LC	3
			Myotis levis (I. Geoffroy, 1824)	Insetívoro Aéreo	LC	110
			Myotis nigricans (Schinz, 1821)	Insetívoro Aéreo (high-flyer)	LC	849
			Myotis riparius (Handley, 1960)	Insetívoro Aéreo	LC	226
			Myotis ruber (E. Geoffroy, 1806)	Insetívoro Aéreo	NT	26
			Myotis simus (Thomas, 1901)	Insetívoro Aéreo	DD	28
