# Supplementary material for: Are We In or Out of Conservation Units in Brazil? A Gap Analysis for the Conservation of Bats in Brazil
Source: Research Square preprint supplement (doi:10.21203/rs.3.rs-4004073/v1), 2024-03-14
Supplement: Supplementary file 2 [file 7c82e53d3fafff64abb9fb1b.docx]

## Potential distribution maps of DD (Data deficient) species

For the 21 species with potential occurrence classified as DD (Data Deficient), it is noted that some have a wide distribution, such as *Aeroestes egregius* (Peters, 1870) (Figure S13) and *Tonatia bidens* (Spix, 1823) (Figure S32), which have potential distribution throughout the Brazilian territory, as well as *Eumops delticus* (Thomas, 1923) (Figure S19), which has a distribution area covering the Amazon, Cerrado, and Caatinga. Other species have restricted occurrence, such as *Cynomops mastivus* (Thomas, 1911) (Figure S16), *Diclidurus ingens* (Hernández-Camacho, 1955) (Figure S18), *Lasiurus castanheus* (Handley, 1960) (Figure S22), *Lonchorhina inusitata* (Handley and Ochoa, 1997) (Figure S23), *Myotis simus* (Thomas, 1901) (Figure S25), *Peropteryx trinitatis* (Miller, 1899) (Figure S26), *Saccopteryx gimnura* (Thomas, 1901) (Figure S28), *Thyroptera lavali* (Pine, 1993) (Figure S30), which have their potential distribution areas in the northern region of the country, in the Amazon.

The species *Chiroderma doriae* (Thomas, 1891) has its potential distribution mainly in the Midwest and Southeast, comprising areas of the Cerrado and Atlantic Forest (Figure S14). The species *Cynomops abrasus* (Temminck, 1826) places its potential distribution in areas in the Amazon, Cerrado, and the southern region of the country, including the Brazilian Pampas (Figure S15). The potential distribution of *Cynomops planitostris* (Peters, 1866) occurs in areas in the Amazon, Caatinga, Cerrado, and the Atlantic Forest, along the Brazilian coast (Figure S17). Meanwhile, the species *Eumops mauru*s (Thomas, 1901) occurs in the Amazon, extending to the Midwest in the Brazilian Cerrado (Figure S20). The species *Histiotus velatus* (I. Geoffroy, 1824) has potential distribution in areas in the Cerrado, Atlantic Forest, and Pampas in southern Brazil (Figure S21). On the other hand, the species *Molossops neglectus* (Williams and Genoways, 1980) has potential occurrence mainly in the Atlantic Forest, also possibly occurring in the Caatinga (Figure S24).

It is observed that the species *Thyroptera wynneae* (Velazco, Gregorin, Voss, and Simmons, 2014) has potential distribution in the Amazon, Cerrado, extending to areas in the Atlantic Forest (Figure S31). Areas with potential occurrence of *Vampyressa pusilla* (Wagner, 1843) are noted in the Amazon, areas in the Cerrado, and Atlantic Forest (Figure S33). Meanwhile, the distribution of the species *Rhogeessa hussoni* (Genoways and Baker, 1996) and *Thyroptera devivoi* (Gregorin, Goncalves, Lim, and Engstrom, 2006) occurs in areas in the Cerrado, Amazon, and Caatinga (Figure S27 and S29).

**Methodology**

## Environmental variables

We used 19 bioclimatic variables (resolution of 9.4 x 9.4 km) for the Neotropical region, obtained from the WorldClim database (http://www.worldclim.org/). The data obtained are included in the group of monthly climatic variables sampled between 1970-2000 from WorldClim 2.1 version1. These data are frequently used for Species Distribution Modeling (SDM) to assess the potential distribution of species2. To reduce multicollinearity in our dataset, we performed a Principal Component Analysis (PCA)3 and used the eigenvalues as environmental variables. Then, we selected only the axes that represent an explanation equal to or greater than 95%4, using these axes as model variables.

## Algorithms

For the creation of the SDMs, four algorithms were used: Maxent (MXE)5, Random Forest (RDF)6, Support Vector Machine (SVM)7 and Gaussian-Bayesian (GAU)8, so that an *ensemble* combining the final suitability maps was generated by the four algorithms9. To minimize model uncertainties, we considered an ensemble as the final model10,11.

## Maps of wealth and potential distribution

The species richness values of bats were considered as the sum of all binary occurrence maps generated by the SDM procedure. These maps were summed considering all species, species by trophic guild, and species grouped by conservation status according to the IUCN. Finally, occurrences of species classified as DD by the IUCN were spatialized and presented. All maps were constructed using the QGIS software (http://www.qgis.org/pt_PT/site/ forusers/download.html). For this analysis, the omnivorous and carnivorous trophic guilds were analyzed together, and the insectivorous guild was analyzed in three ways: (i) All insectivores, regardless of foraging type; (ii) *Gleaning insectivores*; and (iii) all insectivores except for *Gleaners*.

## Identification of the contribution of each type of unit

To identify the contribution of UCs and TIs to the conservation of bat species, a grid of 0.05° was created, considering the territorial extent of Brazil as the boundary. This grid was overlaid on the distribution maps of the species, and the presence and absence values of the species were extracted for this grid. Subsequently, the grid cells were overlaid on the map of UCs and TIs, and each cell was classified as UPI, UUS, or TI.

To be considered in any of these categories, a cell needs to have at least 75% of its area within a UC or TI. Cells that did not meet this criterion or were entirely outside UCs or TIs were classified as "unprotected." Additionally, pixels were classified according to the historical distribution of Brazilian biomes (Amazon, Cerrado, Caatinga, Atlantic Forest, Pampas, and Pantanal). Following these procedures, the percentage of distribution area in UPI, UUS, TI, and "unprotected" areas (outside these protected areas) was calculated.

With these data, a factorial Analysis of Variance (ANOVA) was performed with the percentage of distribution area per species as a function of the Type of Protection (Outside, UPI, UUS, and TI), using the Biomes (Amazon, Cerrado, Caatinga, Atlantic Forest, Pampas, and Pantanal) as covariates, as well as Trophic Guilds (insectivores, carnivores, nectarivores, omnivores, and hematophagous). Additionally, a second factorial ANOVA was conducted with the percentage of distribution area per species as a function of the Type of Protection (Outside, UPI, UUS, and TI), using the Biomes (Amazon, Cerrado, Caatinga, Atlantic Forest, Pampas, and Pantanal), and the threat level according to the IUCN as covariates. Data on UCs and the historical distribution of Brazilian biomes were obtained from the Ministry of the Environment (MMA) (http://mapas.mma.gov.br/i3geo/datadownload.htm), and the TIs from the National Indian Foundation (FUNAI, http://www.funai.gov.br/index.php/shape).

**References**

1. Fick, S. E. & Hijmans, R. J. WorldClim 2: new 1-km spatial resolution climate surfaces for global land areas. *Int. J. Climatol.* **37**, 4302–4315 (2017).

2. Lee, D. N., Papeş, M. & van Den Bussche, R. A. Present and potential future distribution of common Vampire bats in the Americas and the associated risk to cattle. *PLoS One* **7**, 1–9 (2012).

3. Legendre, P. & Legendre, L. *Numerical ecology. In Developments in Environmental Modelling series*. *Elsevier* vol. 24 (2012).

4. De Marco, P. & Nóbrega, C. C. Evaluating collinearity effects on species distribution models: An approach based on virtual species simulation. *PLoS One* **13**, (2018).

5. Phillips, S. J., Anderson, R. P., Dudík, M., Schapire, R. E. & Blair, M. E. Opening the black box: an open-source release of Maxent. *Ecography (Cop.).* **40**, 887–893 (2017).

6. Prasad, A. M., Iverson, L. R. & Liaw, A. Newer classification and regression tree techniques: Bagging and random forests for ecological prediction. *Ecosystems* **9**, 181–199 (2006).

7. Guo, Q., Kelly, M. & Graham, C. H. Support vector machines for predicting distribution of Sudden Oak Death in California. *Ecol. Modell.* **182**, 75–90 (2005).

8. Golding, N. & Purse, B. V. Fast and flexible Bayesian species distribution modelling using Gaussian processes. *Methods Ecol. Evol.* **7**, 598–608 (2016).

9. Diniz-Filho, J. A. F., JR, P. D. M. & HAWKINS, B. A. Defying the curse of ignorance: perspectives in insect macroecology and conservation biogeography. *Insect Conserv. Divers.* **3**, 172–179 (2010).

10. Velazco, S. J. E., Villalobos, F., Galvão, F. & De Marco Júnior, P. A dark scenario for Cerrado plant species: Effects of future climate, land use and protected areas ineffectiveness. *Divers. Distrib.* **25**, 660–673 (2019).

11. Pimenta, M. *et al.* One size does not fit all: Priority areas for real world problems. *Ecol. Modell.* **470**, 110013 (2022).
