# Supplementary material for: Are We In or Out of Conservation Units in Brazil? A Gap Analysis for the Conservation of Bats in Brazil
Source: Research Square preprint supplement (doi:10.21203/rs.3.rs-4004073/v1), 2024-03-14
Supplement: Supplementary file 3 [file 8dd123d901dbdf98e433ca0c.xlsx]

## Sheet: Tabela S02
Species	Algorithm	Partition	Threshold	AUC	Kappa	TSS	Jaccard	Sorensen
Aeorestes egregius	GAU	JACCARD	BOOT	0.93	0.87	0.87	0.89	0.94
	MXD	JACCARD	BOOT	0.98	0.93	0.93	0.95	0.97
	RDF	JACCARD	BOOT	0.67	0.47	0.47	0.69	0.80
	SUP	JACCARD	BOOT	0.98	0.97	0.97	0.97	0.98
	SVM	JACCARD	BOOT	0.92	0.83	0.83	0.87	0.92
Aeorestes villosissimus	GAU	JACCARD	BOOT	0.88	0.69	0.69	0.73	0.84
	MXD	JACCARD	BOOT	0.88	0.67	0.67	0.74	0.85
	RDF	JACCARD	BOOT	0.89	0.70	0.70	0.76	0.86
	SUP	JACCARD	BOOT	0.92	0.77	0.77	0.79	0.88
	SVM	JACCARD	BOOT	0.93	0.77	0.77	0.81	0.89
Ametrida centurio	GAU	JACCARD	BOOT	0.95	0.82	0.82	0.85	0.92
	MXD	JACCARD	BOOT	0.97	0.87	0.87	0.88	0.94
	RDF	JACCARD	BOOT	0.94	0.85	0.85	0.87	0.93
	SUP	JACCARD	BOOT	0.97	0.86	0.86	0.87	0.93
	SVM	JACCARD	BOOT	0.94	0.75	0.75	0.79	0.88
Anoura caudifer	GAU	JACCARD	BOOT	0.86	0.59	0.59	0.69	0.82
	MXD	JACCARD	BOOT	0.90	0.67	0.67	0.74	0.85
	RDF	JACCARD	BOOT	0.90	0.66	0.66	0.74	0.85
	SUP	JACCARD	BOOT	0.91	0.67	0.67	0.74	0.85
	SVM	JACCARD	BOOT	0.87	0.57	0.57	0.69	0.81
Anoura geoffroyi	GAU	JACCARD	BOOT	0.89	0.63	0.63	0.71	0.83
	MXD	JACCARD	BOOT	0.90	0.66	0.66	0.73	0.84
	RDF	JACCARD	BOOT	0.92	0.72	0.72	0.76	0.87
	SUP	JACCARD	BOOT	0.91	0.71	0.71	0.76	0.86
	SVM	JACCARD	BOOT	0.90	0.67	0.67	0.74	0.85
Artibeus anderseni	GAU	JACCARD	BOOT	0.92	0.78	0.78	0.82	0.90
	MXD	JACCARD	BOOT	0.96	0.83	0.83	0.85	0.92
	RDF	JACCARD	BOOT	0.95	0.82	0.82	0.84	0.91
	SUP	JACCARD	BOOT	0.96	0.83	0.83	0.85	0.92
	SVM	JACCARD	BOOT	0.92	0.82	0.82	0.84	0.91
Artibeus bogotensis	GAU	JACCARD	BOOT	0.95	0.84	0.84	0.86	0.92
	MXD	JACCARD	BOOT	0.96	0.84	0.84	0.86	0.93
	RDF	JACCARD	BOOT	0.95	0.87	0.87	0.88	0.94
	SUP	JACCARD	BOOT	0.95	0.88	0.88	0.89	0.94
	SVM	JACCARD	BOOT	0.93	0.78	0.78	0.81	0.89
Artibeus cinereus	GAU	JACCARD	BOOT	0.82	0.47	0.47	0.64	0.78
	MXD	JACCARD	BOOT	0.86	0.57	0.57	0.68	0.81
	RDF	JACCARD	BOOT	0.88	0.59	0.59	0.69	0.82
	SUP	JACCARD	BOOT	0.88	0.61	0.61	0.69	0.82
	SVM	JACCARD	BOOT	0.82	0.53	0.53	0.65	0.79
Artibeus concolor	GAU	JACCARD	BOOT	0.94	0.84	0.84	0.86	0.92
	MXD	JACCARD	BOOT	0.93	0.81	0.81	0.83	0.91
	RDF	JACCARD	BOOT	0.94	0.80	0.80	0.82	0.90
	SUP	JACCARD	BOOT	0.95	0.86	0.86	0.87	0.93
	SVM	JACCARD	BOOT	0.95	0.82	0.82	0.84	0.91
Artibeus fimbriatus	GAU	JACCARD	BOOT	0.89	0.64	0.64	0.70	0.82
	MXD	JACCARD	BOOT	0.93	0.82	0.82	0.83	0.91
	RDF	JACCARD	BOOT	0.95	0.81	0.81	0.82	0.90
	SUP	JACCARD	BOOT	0.95	0.83	0.83	0.83	0.91
	SVM	JACCARD	BOOT	0.93	0.78	0.78	0.80	0.89
Artibeus gnomus	GAU	JACCARD	BOOT	0.85	0.64	0.64	0.71	0.83
	MXD	JACCARD	BOOT	0.87	0.65	0.65	0.71	0.83
	RDF	JACCARD	BOOT	0.91	0.73	0.73	0.77	0.87
	SUP	JACCARD	BOOT	0.91	0.72	0.72	0.77	0.87
	SVM	JACCARD	BOOT	0.89	0.65	0.65	0.71	0.83
Artibeus lituratus	GAU	JACCARD	BOOT	0.87	0.56	0.56	0.68	0.81
	MXD	JACCARD	BOOT	0.87	0.57	0.57	0.69	0.81
	RDF	JACCARD	BOOT	0.92	0.71	0.71	0.75	0.86
	SUP	JACCARD	BOOT	0.92	0.69	0.69	0.74	0.85
	SVM	JACCARD	BOOT	0.88	0.62	0.62	0.70	0.82
Artibeus obscurus	GAU	JACCARD	BOOT	0.84	0.51	0.51	0.65	0.79
	MXD	JACCARD	BOOT	0.89	0.61	0.61	0.69	0.82
	RDF	JACCARD	BOOT	0.90	0.68	0.68	0.74	0.85
	SUP	JACCARD	BOOT	0.90	0.67	0.67	0.74	0.85
	SVM	JACCARD	BOOT	0.85	0.59	0.59	0.69	0.82
Artibeus planirostris	GAU	JACCARD	BOOT	0.79	0.50	0.50	0.65	0.79
	MXD	JACCARD	BOOT	0.83	0.53	0.53	0.65	0.79
	RDF	JACCARD	BOOT	0.86	0.59	0.59	0.69	0.82
	SUP	JACCARD	BOOT	0.86	0.59	0.59	0.69	0.81
	SVM	JACCARD	BOOT	0.81	0.53	0.53	0.66	0.80
Carollia benkeithi	GAU	JACCARD	BOOT	0.97	0.90	0.90	0.91	0.95
	MXD	JACCARD	BOOT	0.92	0.83	0.83	0.86	0.92
	RDF	JACCARD	BOOT	0.93	0.83	0.83	0.86	0.92
	SUP	JACCARD	BOOT	0.95	0.88	0.88	0.90	0.95
	SVM	JACCARD	BOOT	0.95	0.85	0.85	0.88	0.93
Carollia brevicaudum	GAU	JACCARD	BOOT	0.91	0.68	0.68	0.74	0.85
	MXD	JACCARD	BOOT	0.91	0.68	0.68	0.74	0.85
	RDF	JACCARD	BOOT	0.93	0.73	0.73	0.78	0.87
	SUP	JACCARD	BOOT	0.93	0.73	0.73	0.78	0.87
	SVM	JACCARD	BOOT	0.90	0.68	0.68	0.74	0.85
Carollia perspicillata	GAU	JACCARD	BOOT	0.82	0.45	0.45	0.63	0.77
	MXD	JACCARD	BOOT	0.81	0.46	0.46	0.63	0.77
	RDF	JACCARD	BOOT	0.90	0.67	0.67	0.73	0.84
	SUP	JACCARD	BOOT	0.90	0.65	0.65	0.72	0.83
	SVM	JACCARD	BOOT	0.84	0.53	0.53	0.66	0.79
Centronycteris maximiliani	GAU	JACCARD	BOOT	0.79	0.68	0.68	0.73	0.84
	MXD	JACCARD	BOOT	0.83	0.65	0.65	0.73	0.84
	RDF	JACCARD	BOOT	0.85	0.70	0.70	0.77	0.87
	SUP	JACCARD	BOOT	0.87	0.78	0.78	0.83	0.91
	SVM	JACCARD	BOOT	0.78	0.58	0.58	0.69	0.82
Chiroderma doriae	GAU	JACCARD	BOOT	0.87	0.68	0.68	0.75	0.86
	MXD	JACCARD	BOOT	0.89	0.76	0.76	0.79	0.88
	RDF	JACCARD	BOOT	0.94	0.82	0.82	0.84	0.91
	SUP	JACCARD	BOOT	0.93	0.81	0.81	0.83	0.91
	SVM	JACCARD	BOOT	0.90	0.69	0.69	0.75	0.86
Chiroderma trinitatum	GAU	JACCARD	BOOT	0.91	0.71	0.71	0.77	0.87
	MXD	JACCARD	BOOT	0.91	0.70	0.70	0.76	0.86
	RDF	JACCARD	BOOT	0.94	0.78	0.78	0.81	0.89
	SUP	JACCARD	BOOT	0.93	0.78	0.78	0.81	0.89
	SVM	JACCARD	BOOT	0.90	0.74	0.74	0.78	0.87
Chiroderma villosum	GAU	JACCARD	BOOT	0.86	0.60	0.60	0.70	0.82
	MXD	JACCARD	BOOT	0.87	0.60	0.60	0.70	0.82
	RDF	JACCARD	BOOT	0.89	0.63	0.63	0.72	0.84
	SUP	JACCARD	BOOT	0.89	0.63	0.63	0.72	0.84
	SVM	JACCARD	BOOT	0.85	0.60	0.60	0.70	0.83
Choeroniscus godmani	GAU	JACCARD	BOOT	0.95	0.83	0.83	0.84	0.91
	MXD	JACCARD	BOOT	0.96	0.83	0.83	0.84	0.91
	RDF	JACCARD	BOOT	0.96	0.86	0.86	0.87	0.93
	SUP	JACCARD	BOOT	0.96	0.85	0.85	0.86	0.92
	SVM	JACCARD	BOOT	0.94	0.80	0.80	0.82	0.90
Choeroniscus minor	GAU	JACCARD	BOOT	0.88	0.76	0.76	0.81	0.89
	MXD	JACCARD	BOOT	0.94	0.84	0.84	0.86	0.92
	RDF	JACCARD	BOOT	0.91	0.72	0.72	0.78	0.87
	SUP	JACCARD	BOOT	0.94	0.85	0.85	0.87	0.93
	SVM	JACCARD	BOOT	0.91	0.78	0.78	0.81	0.90
Chrotopterus auritus	GAU	JACCARD	BOOT	0.75	0.40	0.40	0.61	0.76
	MXD	JACCARD	BOOT	0.79	0.48	0.48	0.63	0.77
	RDF	JACCARD	BOOT	0.84	0.58	0.58	0.68	0.81
	SUP	JACCARD	BOOT	0.82	0.56	0.56	0.66	0.80
	SVM	JACCARD	BOOT	0.76	0.47	0.47	0.62	0.76
Cormura brevirostris	GAU	JACCARD	BOOT	0.93	0.79	0.79	0.82	0.90
	MXD	JACCARD	BOOT	0.92	0.79	0.79	0.81	0.90
	RDF	JACCARD	BOOT	0.95	0.79	0.79	0.82	0.90
	SUP	JACCARD	BOOT	0.94	0.81	0.81	0.83	0.91
	SVM	JACCARD	BOOT	0.94	0.80	0.80	0.82	0.90
Cynomops abrasus	GAU	JACCARD	BOOT	0.86	0.65	0.65	0.73	0.84
	MXD	JACCARD	BOOT	0.86	0.67	0.67	0.74	0.85
	RDF	JACCARD	BOOT	0.87	0.65	0.65	0.72	0.84
	SUP	JACCARD	BOOT	0.88	0.71	0.71	0.76	0.86
	SVM	JACCARD	BOOT	0.83	0.62	0.62	0.71	0.83
Cynomops greenhalli	GAU	JACCARD	BOOT	0.90	0.77	0.77	0.81	0.89
	MXD	JACCARD	BOOT	0.91	0.76	0.76	0.80	0.89
	RDF	JACCARD	BOOT	0.87	0.81	0.81	0.85	0.92
	SUP	JACCARD	BOOT	0.90	0.83	0.83	0.85	0.92
	SVM	JACCARD	BOOT	0.86	0.80	0.80	0.83	0.90
Cynomops mastivus	GAU	JACCARD	BOOT	0.60	0.22	0.22	0.56	0.72
	MXD	JACCARD	BOOT	0.44	0.15	0.15	0.54	0.70
	RDF	JACCARD	BOOT	0.48	0.20	0.20	0.55	0.71
	SUP	JACCARD	BOOT	0.62	0.35	0.35	0.60	0.75
	SVM	JACCARD	BOOT	0.64	0.30	0.30	0.59	0.74
Cynomops milleri	GAU	JACCARD	BOOT	0.87	0.68	0.68	0.76	0.86
	MXD	JACCARD	BOOT	0.96	0.85	0.85	0.87	0.93
	RDF	JACCARD	BOOT	0.89	0.72	0.72	0.79	0.88
	SUP	JACCARD	BOOT	0.95	0.82	0.82	0.85	0.91
	SVM	JACCARD	BOOT	0.93	0.78	0.78	0.82	0.90
Cynomops planirostris	GAU	JACCARD	BOOT	0.79	0.56	0.56	0.68	0.81
	MXD	JACCARD	BOOT	0.83	0.53	0.53	0.66	0.79
	RDF	JACCARD	BOOT	0.85	0.63	0.63	0.70	0.82
	SUP	JACCARD	BOOT	0.84	0.62	0.62	0.71	0.83
	SVM	JACCARD	BOOT	0.77	0.59	0.59	0.70	0.82
Cyttarops alecto	GAU	JACCARD	BOOT	0.61	0.24	0.24	0.57	0.72
	MXD	JACCARD	BOOT	0.76	0.52	0.52	0.67	0.80
	RDF	JACCARD	BOOT	0.47	0.14	0.14	0.54	0.70
	SUP	JACCARD	BOOT	0.78	0.56	0.56	0.68	0.81
	SVM	JACCARD	BOOT	0.57	0.24	0.24	0.57	0.72
Dasypterus ega	GAU	JACCARD	BOOT	0.78	0.47	0.47	0.63	0.77
	MXD	JACCARD	BOOT	0.82	0.51	0.51	0.65	0.79
	RDF	JACCARD	BOOT	0.87	0.61	0.61	0.68	0.81
	SUP	JACCARD	BOOT	0.86	0.60	0.60	0.68	0.81
	SVM	JACCARD	BOOT	0.82	0.51	0.51	0.65	0.79
Desmodus rotundus	GAU	JACCARD	BOOT	0.87	0.58	0.58	0.67	0.81
	MXD	JACCARD	BOOT	0.86	0.57	0.57	0.67	0.80
	RDF	JACCARD	BOOT	0.91	0.67	0.67	0.73	0.84
	SUP	JACCARD	BOOT	0.90	0.65	0.65	0.71	0.83
	SVM	JACCARD	BOOT	0.87	0.62	0.62	0.69	0.82
Diaemus youngii	GAU	JACCARD	BOOT	0.72	0.45	0.45	0.62	0.77
	MXD	JACCARD	BOOT	0.70	0.36	0.36	0.59	0.74
	RDF	JACCARD	BOOT	0.73	0.39	0.39	0.59	0.74
	SUP	JACCARD	BOOT	0.74	0.52	0.52	0.65	0.78
	SVM	JACCARD	BOOT	0.74	0.53	0.53	0.65	0.79
Diclidurus albus	GAU	JACCARD	BOOT	0.92	0.77	0.77	0.80	0.89
	MXD	JACCARD	BOOT	0.94	0.81	0.81	0.82	0.90
	RDF	JACCARD	BOOT	0.92	0.77	0.77	0.80	0.89
	SUP	JACCARD	BOOT	0.94	0.81	0.81	0.82	0.90
	SVM	JACCARD	BOOT	0.91	0.76	0.76	0.78	0.88
Diclidurus ingens	GAU	JACCARD	BOOT	0.88	0.80	0.80	0.85	0.91
	MXD	JACCARD	BOOT	0.98	0.93	0.93	0.95	0.97
	RDF	JACCARD	BOOT	0.91	0.83	0.83	0.88	0.93
	SUP	JACCARD	BOOT	0.97	0.93	0.93	0.95	0.97
	SVM	JACCARD	BOOT	0.83	0.73	0.73	0.80	0.89
Diclidurus isabella	GAU	JACCARD	BOOT	1.00	1.00	1.00	1.00	1.00
	MXD	JACCARD	BOOT	1.00	1.00	1.00	1.00	1.00
	RDF	JACCARD	BOOT	1.00	1.00	1.00	1.00	1.00
	SUP	JACCARD	BOOT	1.00	1.00	1.00	1.00	1.00
	SVM	JACCARD	BOOT	1.00	1.00	1.00	1.00	1.00
Diclidurus scutatus	GAU	JACCARD	BOOT	0.95	0.92	0.92	0.92	0.96
	MXD	JACCARD	BOOT	0.98	0.92	0.92	0.93	0.96
	RDF	JACCARD	BOOT	0.93	0.92	0.92	0.92	0.96
	SUP	JACCARD	BOOT	0.95	0.92	0.92	0.92	0.96
	SVM	JACCARD	BOOT	0.94	0.88	0.88	0.89	0.94
Diphylla ecaudata	GAU	JACCARD	BOOT	0.88	0.61	0.61	0.70	0.82
	MXD	JACCARD	BOOT	0.92	0.71	0.71	0.76	0.86
	RDF	JACCARD	BOOT	0.93	0.76	0.76	0.79	0.88
	SUP	JACCARD	BOOT	0.93	0.75	0.75	0.79	0.88
	SVM	JACCARD	BOOT	0.92	0.73	0.73	0.76	0.87
Eptesicus brasiliensis	GAU	JACCARD	BOOT	0.78	0.44	0.44	0.61	0.76
	MXD	JACCARD	BOOT	0.79	0.47	0.47	0.61	0.76
	RDF	JACCARD	BOOT	0.83	0.57	0.57	0.66	0.80
	SUP	JACCARD	BOOT	0.83	0.56	0.56	0.66	0.79
	SVM	JACCARD	BOOT	0.78	0.49	0.49	0.63	0.77
Eptesicus chiriquinus	GAU	JACCARD	BOOT	0.82	0.63	0.63	0.72	0.84
	MXD	JACCARD	BOOT	0.82	0.55	0.55	0.68	0.81
	RDF	JACCARD	BOOT	0.89	0.68	0.68	0.75	0.86
	SUP	JACCARD	BOOT	0.86	0.67	0.67	0.74	0.85
	SVM	JACCARD	BOOT	0.76	0.56	0.56	0.69	0.81
Eptesicus diminutus	GAU	JACCARD	BOOT	0.77	0.49	0.49	0.63	0.77
	MXD	JACCARD	BOOT	0.81	0.56	0.56	0.65	0.79
	RDF	JACCARD	BOOT	0.81	0.56	0.56	0.67	0.80
	SUP	JACCARD	BOOT	0.83	0.61	0.61	0.69	0.82
	SVM	JACCARD	BOOT	0.76	0.49	0.49	0.62	0.77
Eptesicus furinalis	GAU	JACCARD	BOOT	0.82	0.47	0.47	0.64	0.78
	MXD	JACCARD	BOOT	0.82	0.47	0.47	0.63	0.77
	RDF	JACCARD	BOOT	0.89	0.62	0.62	0.71	0.83
	SUP	JACCARD	BOOT	0.89	0.62	0.62	0.71	0.83
	SVM	JACCARD	BOOT	0.83	0.51	0.51	0.65	0.79
Eumops auripendulus	GAU	JACCARD	BOOT	0.67	0.32	0.32	0.59	0.75
	MXD	JACCARD	BOOT	0.67	0.32	0.32	0.59	0.74
	RDF	JACCARD	BOOT	0.74	0.45	0.45	0.63	0.77
	SUP	JACCARD	BOOT	0.74	0.48	0.48	0.64	0.78
	SVM	JACCARD	BOOT	0.71	0.38	0.38	0.60	0.75
Eumops bonariensis	GAU	JACCARD	BOOT	0.84	0.59	0.59	0.67	0.80
	MXD	JACCARD	BOOT	0.84	0.54	0.54	0.66	0.79
	RDF	JACCARD	BOOT	0.88	0.65	0.65	0.71	0.83
	SUP	JACCARD	BOOT	0.87	0.62	0.62	0.70	0.82
	SVM	JACCARD	BOOT	0.85	0.60	0.60	0.69	0.82
Eumops dabbenei	GAU	JACCARD	BOOT	0.35	0.05	0.05	0.52	0.68
	MXD	JACCARD	BOOT	0.65	0.30	0.30	0.65	0.77
	RDF	JACCARD	BOOT	0.70	0.40	0.40	0.68	0.79
	SUP	JACCARD	BOOT	0.70	0.45	0.45	0.70	0.81
	SVM	JACCARD	BOOT	0.33	0.00	0.00	0.50	0.67
Eumops delticus	GAU	JACCARD	BOOT	0.88	0.80	0.80	0.85	0.91
	MXD	JACCARD	BOOT	0.87	0.70	0.70	0.78	0.87
	RDF	JACCARD	BOOT	0.81	0.70	0.70	0.78	0.87
	SUP	JACCARD	BOOT	0.82	0.73	0.73	0.80	0.89
	SVM	JACCARD	BOOT	0.39	0.03	0.03	0.51	0.68
Eumops glaucinus	GAU	JACCARD	BOOT	0.82	0.44	0.44	0.63	0.78
	MXD	JACCARD	BOOT	0.83	0.50	0.50	0.65	0.79
	RDF	JACCARD	BOOT	0.85	0.58	0.58	0.68	0.81
	SUP	JACCARD	BOOT	0.85	0.59	0.59	0.69	0.81
	SVM	JACCARD	BOOT	0.82	0.50	0.50	0.65	0.78
Eumops hansae	GAU	JACCARD	BOOT	0.81	0.64	0.64	0.73	0.84
	MXD	JACCARD	BOOT	0.89	0.70	0.70	0.76	0.86
	RDF	JACCARD	BOOT	0.79	0.55	0.55	0.67	0.80
	SUP	JACCARD	BOOT	0.86	0.68	0.68	0.74	0.85
	SVM	JACCARD	BOOT	0.79	0.58	0.58	0.69	0.81
Eumops maurus	GAU	JACCARD	BOOT	0.58	0.28	0.28	0.57	0.73
	MXD	JACCARD	BOOT	0.59	0.40	0.40	0.61	0.76
	RDF	JACCARD	BOOT	0.56	0.24	0.24	0.55	0.71
	SUP	JACCARD	BOOT	0.59	0.36	0.36	0.60	0.75
	SVM	JACCARD	BOOT	0.53	0.20	0.20	0.55	0.71
Eumops patagonicus	GAU	JACCARD	BOOT	1.00	0.98	0.98	0.98	0.99
	MXD	JACCARD	BOOT	1.00	0.99	0.99	0.99	1.00
	RDF	JACCARD	BOOT	0.99	0.95	0.95	0.96	0.98
	SUP	JACCARD	BOOT	1.00	0.98	0.98	0.99	0.99
	SVM	JACCARD	BOOT	0.99	0.96	0.96	0.97	0.98
Eumops perotis	GAU	JACCARD	BOOT	0.77	0.51	0.51	0.65	0.79
	MXD	JACCARD	BOOT	0.79	0.48	0.48	0.64	0.78
	RDF	JACCARD	BOOT	0.86	0.60	0.60	0.67	0.80
	SUP	JACCARD	BOOT	0.84	0.62	0.62	0.68	0.80
	SVM	JACCARD	BOOT	0.81	0.60	0.60	0.65	0.79
Eumops trumbulli	GAU	JACCARD	BOOT	0.98	0.95	0.95	0.97	0.98
	MXD	JACCARD	BOOT	1.00	1.00	1.00	1.00	1.00
	RDF	JACCARD	BOOT	1.00	1.00	1.00	1.00	1.00
	SUP	JACCARD	BOOT	1.00	1.00	1.00	1.00	1.00
	SVM	JACCARD	BOOT	0.63	0.33	0.33	0.63	0.76
Furipterus horrens	GAU	JACCARD	BOOT	0.79	0.55	0.55	0.65	0.79
	MXD	JACCARD	BOOT	0.81	0.54	0.54	0.68	0.81
	RDF	JACCARD	BOOT	0.87	0.69	0.69	0.74	0.85
	SUP	JACCARD	BOOT	0.85	0.62	0.62	0.71	0.83
	SVM	JACCARD	BOOT	0.75	0.48	0.48	0.63	0.77
Gardnerycteris crenulatum	GAU	JACCARD	BOOT	0.83	0.58	0.58	0.70	0.82
	MXD	JACCARD	BOOT	0.84	0.60	0.60	0.71	0.83
	RDF	JACCARD	BOOT	0.89	0.65	0.65	0.72	0.84
	SUP	JACCARD	BOOT	0.88	0.65	0.65	0.72	0.84
	SVM	JACCARD	BOOT	0.84	0.57	0.57	0.69	0.82
Glossophaga commissarisi	GAU	JACCARD	BOOT	0.98	0.91	0.91	0.91	0.95
	MXD	JACCARD	BOOT	0.99	0.91	0.91	0.91	0.95
	RDF	JACCARD	BOOT	0.98	0.93	0.93	0.93	0.96
	SUP	JACCARD	BOOT	0.99	0.92	0.92	0.93	0.96
	SVM	JACCARD	BOOT	0.98	0.90	0.90	0.91	0.95
Glossophaga longirostris	GAU	JACCARD	BOOT	0.97	0.86	0.86	0.87	0.93
	MXD	JACCARD	BOOT	0.98	0.88	0.88	0.89	0.94
	RDF	JACCARD	BOOT	0.97	0.86	0.86	0.88	0.93
	SUP	JACCARD	BOOT	0.98	0.88	0.88	0.88	0.94
	SVM	JACCARD	BOOT	0.96	0.84	0.84	0.86	0.92
Glossophaga soricina	GAU	JACCARD	BOOT	0.87	0.58	0.58	0.69	0.81
	MXD	JACCARD	BOOT	0.87	0.55	0.55	0.67	0.80
	RDF	JACCARD	BOOT	0.92	0.70	0.70	0.74	0.85
	SUP	JACCARD	BOOT	0.91	0.68	0.68	0.73	0.85
	SVM	JACCARD	BOOT	0.88	0.62	0.62	0.70	0.82
Glyphonycteris daviesi	GAU	JACCARD	BOOT	0.88	0.76	0.76	0.81	0.89
	MXD	JACCARD	BOOT	0.86	0.66	0.66	0.75	0.85
	RDF	JACCARD	BOOT	0.92	0.86	0.86	0.87	0.92
	SUP	JACCARD	BOOT	0.92	0.86	0.86	0.88	0.93
	SVM	JACCARD	BOOT	0.80	0.64	0.64	0.70	0.82
Glyphonycteris sylvestris	GAU	JACCARD	BOOT	0.87	0.64	0.64	0.73	0.84
	MXD	JACCARD	BOOT	0.86	0.68	0.68	0.74	0.85
	RDF	JACCARD	BOOT	0.82	0.55	0.55	0.68	0.81
	SUP	JACCARD	BOOT	0.88	0.67	0.67	0.75	0.85
	SVM	JACCARD	BOOT	0.82	0.51	0.51	0.67	0.80
Histiotus diaphanopterus	GAU	JACCARD	BOOT	0.73	0.50	0.50	0.68	0.81
	MXD	JACCARD	BOOT	0.90	0.80	0.80	0.87	0.92
	RDF	JACCARD	BOOT	0.83	0.65	0.65	0.78	0.87
	SUP	JACCARD	BOOT	0.90	0.80	0.80	0.87	0.92
	SVM	JACCARD	BOOT	0.70	0.45	0.45	0.67	0.79
Histiotus laephotis	GAU	JACCARD	BOOT	0.80	0.70	0.70	0.80	0.88
	MXD	JACCARD	BOOT	0.83	0.75	0.75	0.83	0.90
	RDF	JACCARD	BOOT	1.00	1.00	1.00	1.00	1.00
	SUP	JACCARD	BOOT	0.95	0.90	0.90	0.93	0.96
	SVM	JACCARD	BOOT	0.45	0.20	0.20	0.58	0.73
Histiotus montanus	GAU	JACCARD	BOOT	0.90	0.72	0.72	0.78	0.88
	MXD	JACCARD	BOOT	0.93	0.76	0.76	0.80	0.89
	RDF	JACCARD	BOOT	0.90	0.68	0.68	0.75	0.86
	SUP	JACCARD	BOOT	0.94	0.76	0.76	0.81	0.89
	SVM	JACCARD	BOOT	0.92	0.76	0.76	0.80	0.89
Histiotus velatus	GAU	JACCARD	BOOT	0.92	0.71	0.71	0.76	0.86
	MXD	JACCARD	BOOT	0.92	0.74	0.74	0.77	0.87
	RDF	JACCARD	BOOT	0.93	0.75	0.75	0.79	0.88
	SUP	JACCARD	BOOT	0.93	0.78	0.78	0.80	0.89
	SVM	JACCARD	BOOT	0.91	0.73	0.73	0.77	0.87
Hsunycteris thomasi	GAU	JACCARD	BOOT	0.89	0.68	0.68	0.75	0.86
	MXD	JACCARD	BOOT	0.95	0.77	0.77	0.80	0.89
	RDF	JACCARD	BOOT	0.92	0.67	0.67	0.75	0.85
	SUP	JACCARD	BOOT	0.95	0.77	0.77	0.80	0.89
	SVM	JACCARD	BOOT	0.92	0.72	0.72	0.77	0.87
Lampronycteris brachyotis	GAU	JACCARD	BOOT	0.82	0.65	0.65	0.71	0.83
	MXD	JACCARD	BOOT	0.87	0.68	0.68	0.72	0.84
	RDF	JACCARD	BOOT	0.83	0.55	0.55	0.67	0.80
	SUP	JACCARD	BOOT	0.86	0.67	0.67	0.72	0.84
	SVM	JACCARD	BOOT	0.79	0.60	0.60	0.69	0.81
Lasiurus blossevillii	GAU	JACCARD	BOOT	0.71	0.37	0.37	0.59	0.74
	MXD	JACCARD	BOOT	0.78	0.45	0.45	0.61	0.76
	RDF	JACCARD	BOOT	0.84	0.56	0.56	0.66	0.79
	SUP	JACCARD	BOOT	0.84	0.54	0.54	0.65	0.79
	SVM	JACCARD	BOOT	0.77	0.44	0.44	0.61	0.76
Lasiurus castaneus	GAU	JACCARD	BOOT	1.00	1.00	1.00	1.00	1.00
	MXD	JACCARD	BOOT	1.00	1.00	1.00	1.00	1.00
	RDF	JACCARD	BOOT	1.00	1.00	1.00	1.00	1.00
	SUP	JACCARD	BOOT	1.00	1.00	1.00	1.00	1.00
	SVM	JACCARD	BOOT	0.70	0.70	0.70	0.85	0.90
Lionycteris spurrelli	GAU	JACCARD	BOOT	0.91	0.75	0.75	0.79	0.89
	MXD	JACCARD	BOOT	0.91	0.73	0.73	0.77	0.87
	RDF	JACCARD	BOOT	0.92	0.81	0.81	0.83	0.91
	SUP	JACCARD	BOOT	0.92	0.81	0.81	0.84	0.91
	SVM	JACCARD	BOOT	0.88	0.75	0.75	0.80	0.89
Lonchophylla bokermanni	GAU	JACCARD	BOOT	1.00	1.00	1.00	1.00	1.00
	MXD	JACCARD	BOOT	1.00	1.00	1.00	1.00	1.00
	RDF	JACCARD	BOOT	1.00	1.00	1.00	1.00	1.00
	SUP	JACCARD	BOOT	1.00	1.00	1.00	1.00	1.00
	SVM	JACCARD	BOOT	1.00	1.00	1.00	1.00	1.00
Lonchophylla dekeyseri	GAU	JACCARD	BOOT	0.63	0.30	0.30	0.62	0.75
	MXD	JACCARD	BOOT	0.85	0.70	0.70	0.80	0.88
	RDF	JACCARD	BOOT	0.73	0.50	0.50	0.73	0.83
	SUP	JACCARD	BOOT	0.88	0.75	0.75	0.83	0.90
	SVM	JACCARD	BOOT	0.28	0.00	0.00	0.50	0.67
Lonchophylla mordax	GAU	JACCARD	BOOT	0.60	0.30	0.30	0.59	0.74
	MXD	JACCARD	BOOT	0.71	0.53	0.53	0.68	0.81
	RDF	JACCARD	BOOT	0.66	0.46	0.46	0.65	0.79
	SUP	JACCARD	BOOT	0.70	0.54	0.54	0.68	0.81
	SVM	JACCARD	BOOT	0.50	0.20	0.20	0.56	0.71
Lonchophylla peracchii	GAU	JACCARD	BOOT	1.00	1.00	1.00	1.00	1.00
	MXD	JACCARD	BOOT	1.00	1.00	1.00	1.00	1.00
	RDF	JACCARD	BOOT	1.00	1.00	1.00	1.00	1.00
	SUP	JACCARD	BOOT	1.00	1.00	1.00	1.00	1.00
	SVM	JACCARD	BOOT	1.00	1.00	1.00	1.00	1.00
Lonchorhina aurita	GAU	JACCARD	BOOT	0.76	0.40	0.40	0.62	0.76
	MXD	JACCARD	BOOT	0.81	0.48	0.48	0.65	0.79
	RDF	JACCARD	BOOT	0.87	0.61	0.61	0.69	0.81
	SUP	JACCARD	BOOT	0.86	0.57	0.57	0.68	0.81
	SVM	JACCARD	BOOT	0.77	0.47	0.47	0.64	0.78
Lonchorhina inusitata	GAU	JACCARD	BOOT	1.00	1.00	1.00	1.00	1.00
	MXD	JACCARD	BOOT	0.99	0.95	0.95	0.96	0.98
	RDF	JACCARD	BOOT	0.98	0.93	0.93	0.94	0.97
	SUP	JACCARD	BOOT	1.00	1.00	1.00	1.00	1.00
	SVM	JACCARD	BOOT	0.97	0.93	0.93	0.93	0.96
Lophostoma brasiliense	GAU	JACCARD	BOOT	0.84	0.61	0.61	0.71	0.83
	MXD	JACCARD	BOOT	0.86	0.59	0.59	0.69	0.82
	RDF	JACCARD	BOOT	0.87	0.68	0.68	0.75	0.85
	SUP	JACCARD	BOOT	0.87	0.67	0.67	0.75	0.86
	SVM	JACCARD	BOOT	0.82	0.64	0.64	0.73	0.84
Lophostoma carrikeri	GAU	JACCARD	BOOT	0.86	0.77	0.77	0.82	0.90
	MXD	JACCARD	BOOT	0.95	0.83	0.83	0.86	0.92
	RDF	JACCARD	BOOT	0.91	0.71	0.71	0.78	0.88
	SUP	JACCARD	BOOT	0.93	0.83	0.83	0.86	0.92
	SVM	JACCARD	BOOT	0.86	0.73	0.73	0.79	0.88
Lophostoma schulzi	GAU	JACCARD	BOOT	0.99	0.93	0.93	0.94	0.97
	MXD	JACCARD	BOOT	1.00	1.00	1.00	1.00	1.00
	RDF	JACCARD	BOOT	1.00	1.00	1.00	1.00	1.00
	SUP	JACCARD	BOOT	1.00	1.00	1.00	1.00	1.00
	SVM	JACCARD	BOOT	0.91	0.77	0.77	0.82	0.90
Lophostoma silvicola	GAU	JACCARD	BOOT	0.90	0.73	0.73	0.78	0.87
	MXD	JACCARD	BOOT	0.90	0.71	0.71	0.76	0.86
	RDF	JACCARD	BOOT	0.90	0.72	0.72	0.77	0.87
	SUP	JACCARD	BOOT	0.90	0.74	0.74	0.78	0.88
	SVM	JACCARD	BOOT	0.90	0.71	0.71	0.77	0.87
Macrophyllum macrophyllum	GAU	JACCARD	BOOT	0.80	0.57	0.57	0.69	0.82
	MXD	JACCARD	BOOT	0.80	0.55	0.55	0.68	0.81
	RDF	JACCARD	BOOT	0.80	0.53	0.53	0.68	0.81
	SUP	JACCARD	BOOT	0.81	0.59	0.59	0.70	0.82
	SVM	JACCARD	BOOT	0.81	0.54	0.54	0.67	0.80
Mesophylla macconnelli	GAU	JACCARD	BOOT	0.88	0.68	0.68	0.76	0.86
	MXD	JACCARD	BOOT	0.91	0.68	0.68	0.75	0.86
	RDF	JACCARD	BOOT	0.91	0.71	0.71	0.76	0.86
	SUP	JACCARD	BOOT	0.90	0.71	0.71	0.77	0.87
	SVM	JACCARD	BOOT	0.86	0.71	0.71	0.76	0.87
Micronycteris hirsuta	GAU	JACCARD	BOOT	0.77	0.65	0.65	0.73	0.84
	MXD	JACCARD	BOOT	0.90	0.66	0.66	0.73	0.84
	RDF	JACCARD	BOOT	0.81	0.65	0.65	0.73	0.85
	SUP	JACCARD	BOOT	0.87	0.67	0.67	0.74	0.85
	SVM	JACCARD	BOOT	0.77	0.62	0.62	0.72	0.84
Micronycteris megalotis	GAU	JACCARD	BOOT	0.83	0.45	0.45	0.64	0.78
	MXD	JACCARD	BOOT	0.85	0.52	0.52	0.65	0.79
	RDF	JACCARD	BOOT	0.88	0.62	0.62	0.70	0.83
	SUP	JACCARD	BOOT	0.88	0.62	0.62	0.71	0.83
	SVM	JACCARD	BOOT	0.85	0.52	0.52	0.66	0.79
Micronycteris microtis	GAU	JACCARD	BOOT	0.94	0.77	0.77	0.80	0.89
	MXD	JACCARD	BOOT	0.94	0.80	0.80	0.82	0.90
	RDF	JACCARD	BOOT	0.95	0.81	0.81	0.83	0.91
	SUP	JACCARD	BOOT	0.95	0.82	0.82	0.84	0.91
	SVM	JACCARD	BOOT	0.94	0.78	0.78	0.81	0.89
Micronycteris minuta	GAU	JACCARD	BOOT	0.69	0.30	0.30	0.58	0.73
	MXD	JACCARD	BOOT	0.74	0.33	0.33	0.58	0.74
	RDF	JACCARD	BOOT	0.83	0.52	0.52	0.64	0.78
	SUP	JACCARD	BOOT	0.82	0.51	0.51	0.63	0.77
	SVM	JACCARD	BOOT	0.74	0.32	0.32	0.59	0.74
Micronycteris sanborni	GAU	JACCARD	BOOT	0.98	0.94	0.94	0.94	0.97
	MXD	JACCARD	BOOT	0.98	0.94	0.94	0.94	0.97
	RDF	JACCARD	BOOT	0.99	0.99	0.99	0.99	0.99
	SUP	JACCARD	BOOT	0.99	0.99	0.99	0.99	0.99
	SVM	JACCARD	BOOT	0.94	0.86	0.86	0.87	0.93
Micronycteris schmidtorum	GAU	JACCARD	BOOT	0.93	0.81	0.81	0.83	0.91
	MXD	JACCARD	BOOT	0.92	0.81	0.81	0.83	0.91
	RDF	JACCARD	BOOT	0.92	0.81	0.81	0.83	0.91
	SUP	JACCARD	BOOT	0.93	0.84	0.84	0.86	0.92
	SVM	JACCARD	BOOT	0.92	0.79	0.79	0.82	0.90
Mimon bennettii	GAU	JACCARD	BOOT	0.86	0.59	0.59	0.68	0.81
	MXD	JACCARD	BOOT	0.92	0.75	0.75	0.77	0.87
	RDF	JACCARD	BOOT	0.95	0.79	0.79	0.80	0.89
	SUP	JACCARD	BOOT	0.95	0.81	0.81	0.82	0.90
	SVM	JACCARD	BOOT	0.92	0.77	0.77	0.78	0.88
Molossops neglectus	GAU	JACCARD	BOOT	0.51	0.25	0.25	0.55	0.71
	MXD	JACCARD	BOOT	0.62	0.43	0.43	0.61	0.76
	RDF	JACCARD	BOOT	0.74	0.70	0.70	0.76	0.86
	SUP	JACCARD	BOOT	0.72	0.68	0.68	0.75	0.85
	SVM	JACCARD	BOOT	0.46	0.18	0.18	0.54	0.70
Molossops temminckii	GAU	JACCARD	BOOT	0.81	0.46	0.46	0.63	0.77
	MXD	JACCARD	BOOT	0.82	0.47	0.47	0.64	0.78
	RDF	JACCARD	BOOT	0.85	0.58	0.58	0.68	0.81
	SUP	JACCARD	BOOT	0.85	0.59	0.59	0.69	0.81
	SVM	JACCARD	BOOT	0.82	0.56	0.56	0.67	0.80
Molossus aztecus	GAU	JACCARD	BOOT	1.00	1.00	1.00	1.00	1.00
	MXD	JACCARD	BOOT	1.00	1.00	1.00	1.00	1.00
	RDF	JACCARD	BOOT	1.00	1.00	1.00	1.00	1.00
	SUP	JACCARD	BOOT	1.00	1.00	1.00	1.00	1.00
	SVM	JACCARD	BOOT	1.00	1.00	1.00	1.00	1.00
Molossus coibensis	GAU	JACCARD	BOOT	0.84	0.60	0.60	0.70	0.82
	MXD	JACCARD	BOOT	0.80	0.54	0.54	0.68	0.81
	RDF	JACCARD	BOOT	0.86	0.64	0.64	0.72	0.83
	SUP	JACCARD	BOOT	0.86	0.67	0.67	0.73	0.84
	SVM	JACCARD	BOOT	0.83	0.63	0.63	0.71	0.83
Molossus currentium	GAU	JACCARD	BOOT	0.74	0.33	0.33	0.60	0.75
	MXD	JACCARD	BOOT	0.75	0.36	0.36	0.60	0.75
	RDF	JACCARD	BOOT	0.81	0.54	0.54	0.65	0.79
	SUP	JACCARD	BOOT	0.81	0.55	0.55	0.65	0.78
	SVM	JACCARD	BOOT	0.73	0.36	0.36	0.58	0.74
Molossus molossus	GAU	JACCARD	BOOT	0.76	0.34	0.34	0.58	0.73
	MXD	JACCARD	BOOT	0.78	0.36	0.36	0.59	0.74
	RDF	JACCARD	BOOT	0.86	0.55	0.55	0.66	0.79
	SUP	JACCARD	BOOT	0.85	0.55	0.55	0.65	0.79
	SVM	JACCARD	BOOT	0.80	0.44	0.44	0.61	0.76
Molossus pretiosus	GAU	JACCARD	BOOT	0.88	0.77	0.77	0.81	0.90
	MXD	JACCARD	BOOT	0.93	0.79	0.79	0.82	0.90
	RDF	JACCARD	BOOT	0.91	0.77	0.77	0.81	0.90
	SUP	JACCARD	BOOT	0.92	0.80	0.80	0.83	0.91
	SVM	JACCARD	BOOT	0.86	0.75	0.75	0.80	0.89
Molossus rufus	GAU	JACCARD	BOOT	0.88	0.57	0.57	0.67	0.80
	MXD	JACCARD	BOOT	0.88	0.61	0.61	0.67	0.80
	RDF	JACCARD	BOOT	0.92	0.70	0.70	0.74	0.85
	SUP	JACCARD	BOOT	0.91	0.68	0.68	0.73	0.85
	SVM	JACCARD	BOOT	0.89	0.66	0.66	0.71	0.83
Myotis albescens	GAU	JACCARD	BOOT	0.69	0.28	0.28	0.57	0.73
	MXD	JACCARD	BOOT	0.75	0.36	0.36	0.58	0.74
	RDF	JACCARD	BOOT	0.78	0.41	0.41	0.61	0.76
	SUP	JACCARD	BOOT	0.78	0.42	0.42	0.61	0.75
	SVM	JACCARD	BOOT	0.70	0.34	0.34	0.57	0.73
Myotis levis	GAU	JACCARD	BOOT	0.96	0.89	0.89	0.89	0.94
	MXD	JACCARD	BOOT	0.95	0.86	0.86	0.87	0.93
	RDF	JACCARD	BOOT	0.95	0.82	0.82	0.84	0.91
	SUP	JACCARD	BOOT	0.96	0.88	0.88	0.89	0.94
	SVM	JACCARD	BOOT	0.96	0.88	0.88	0.88	0.94
Myotis nigricans	GAU	JACCARD	BOOT	0.76	0.34	0.34	0.59	0.74
	MXD	JACCARD	BOOT	0.79	0.41	0.41	0.61	0.76
	RDF	JACCARD	BOOT	0.85	0.59	0.59	0.68	0.81
	SUP	JACCARD	BOOT	0.85	0.57	0.57	0.67	0.80
	SVM	JACCARD	BOOT	0.79	0.39	0.39	0.59	0.75
Myotis riparius	GAU	JACCARD	BOOT	0.82	0.49	0.49	0.65	0.79
	MXD	JACCARD	BOOT	0.83	0.53	0.53	0.65	0.79
	RDF	JACCARD	BOOT	0.86	0.60	0.60	0.70	0.82
	SUP	JACCARD	BOOT	0.86	0.58	0.58	0.69	0.82
	SVM	JACCARD	BOOT	0.81	0.54	0.54	0.66	0.80
Myotis ruber	GAU	JACCARD	BOOT	0.70	0.39	0.39	0.61	0.76
	MXD	JACCARD	BOOT	0.84	0.61	0.61	0.72	0.83
	RDF	JACCARD	BOOT	0.74	0.60	0.60	0.69	0.81
	SUP	JACCARD	BOOT	0.80	0.63	0.63	0.70	0.82
	SVM	JACCARD	BOOT	0.65	0.33	0.33	0.58	0.73
Myotis simus	GAU	JACCARD	BOOT	0.95	0.83	0.83	0.85	0.92
	MXD	JACCARD	BOOT	0.93	0.81	0.81	0.84	0.91
	RDF	JACCARD	BOOT	0.93	0.83	0.83	0.84	0.91
	SUP	JACCARD	BOOT	0.94	0.83	0.83	0.85	0.92
	SVM	JACCARD	BOOT	0.90	0.79	0.79	0.82	0.90
Natalus macrourus	GAU	JACCARD	BOOT	0.90	0.90	0.90	0.90	0.94
	MXD	JACCARD	BOOT	1.00	1.00	1.00	1.00	1.00
	RDF	JACCARD	BOOT	0.97	0.90	0.90	0.93	0.96
	SUP	JACCARD	BOOT	1.00	1.00	1.00	1.00	1.00
	SVM	JACCARD	BOOT	0.87	0.83	0.83	0.84	0.91
Neoplatymops mattogrossensis	GAU	JACCARD	BOOT	0.94	0.82	0.82	0.85	0.92
	MXD	JACCARD	BOOT	0.92	0.78	0.78	0.83	0.90
	RDF	JACCARD	BOOT	1.00	1.00	1.00	1.00	1.00
	SUP	JACCARD	BOOT	1.00	1.00	1.00	1.00	1.00
	SVM	JACCARD	BOOT	0.96	0.88	0.88	0.90	0.95
Noctilio albiventris	GAU	JACCARD	BOOT	0.81	0.50	0.50	0.66	0.79
	MXD	JACCARD	BOOT	0.83	0.52	0.52	0.66	0.80
	RDF	JACCARD	BOOT	0.82	0.52	0.52	0.66	0.80
	SUP	JACCARD	BOOT	0.83	0.55	0.55	0.67	0.80
	SVM	JACCARD	BOOT	0.81	0.50	0.50	0.65	0.79
Noctilio leporinus	GAU	JACCARD	BOOT	0.81	0.44	0.44	0.61	0.76
	MXD	JACCARD	BOOT	0.82	0.45	0.45	0.61	0.76
	RDF	JACCARD	BOOT	0.89	0.62	0.62	0.70	0.82
	SUP	JACCARD	BOOT	0.88	0.61	0.61	0.69	0.82
	SVM	JACCARD	BOOT	0.82	0.47	0.47	0.62	0.77
Nyctinomops aurispinosus	GAU	JACCARD	BOOT	0.90	0.81	0.81	0.81	0.89
	MXD	JACCARD	BOOT	0.94	0.86	0.86	0.86	0.92
	RDF	JACCARD	BOOT	0.91	0.80	0.80	0.81	0.89
	SUP	JACCARD	BOOT	0.90	0.84	0.84	0.84	0.91
	SVM	JACCARD	BOOT	0.87	0.82	0.82	0.82	0.90
Nyctinomops laticaudatus	GAU	JACCARD	BOOT	0.83	0.57	0.57	0.67	0.80
	MXD	JACCARD	BOOT	0.83	0.52	0.52	0.66	0.79
	RDF	JACCARD	BOOT	0.88	0.63	0.63	0.71	0.83
	SUP	JACCARD	BOOT	0.87	0.63	0.63	0.71	0.83
	SVM	JACCARD	BOOT	0.83	0.57	0.57	0.68	0.81
Nyctinomops macrotis	GAU	JACCARD	BOOT	0.91	0.75	0.75	0.77	0.87
	MXD	JACCARD	BOOT	0.91	0.78	0.78	0.79	0.88
	RDF	JACCARD	BOOT	0.94	0.78	0.78	0.81	0.89
	SUP	JACCARD	BOOT	0.93	0.79	0.79	0.80	0.89
	SVM	JACCARD	BOOT	0.88	0.73	0.73	0.76	0.86
Peropteryx kappleri	GAU	JACCARD	BOOT	0.86	0.75	0.75	0.79	0.88
	MXD	JACCARD	BOOT	0.86	0.72	0.72	0.77	0.87
	RDF	JACCARD	BOOT	0.88	0.75	0.75	0.79	0.88
	SUP	JACCARD	BOOT	0.87	0.78	0.78	0.81	0.89
	SVM	JACCARD	BOOT	0.90	0.73	0.73	0.78	0.87
Peropteryx leucoptera	GAU	JACCARD	BOOT	1.00	1.00	1.00	1.00	1.00
	MXD	JACCARD	BOOT	1.00	1.00	1.00	1.00	1.00
	RDF	JACCARD	BOOT	1.00	1.00	1.00	1.00	1.00
	SUP	JACCARD	BOOT	1.00	1.00	1.00	1.00	1.00
	SVM	JACCARD	BOOT	1.00	1.00	1.00	1.00	1.00
Peropteryx macrotis	GAU	JACCARD	BOOT	0.75	0.43	0.43	0.63	0.78
	MXD	JACCARD	BOOT	0.82	0.50	0.50	0.65	0.79
	RDF	JACCARD	BOOT	0.89	0.59	0.59	0.68	0.81
	SUP	JACCARD	BOOT	0.88	0.59	0.59	0.69	0.81
	SVM	JACCARD	BOOT	0.80	0.49	0.49	0.65	0.79
Peropteryx trinitatis	GAU	JACCARD	BOOT	0.95	0.91	0.91	0.91	0.95
	MXD	JACCARD	BOOT	0.97	0.90	0.90	0.91	0.95
	RDF	JACCARD	BOOT	0.97	0.91	0.91	0.92	0.96
	SUP	JACCARD	BOOT	0.98	0.96	0.96	0.96	0.98
	SVM	JACCARD	BOOT	0.93	0.81	0.81	0.84	0.91
Phylloderma stenops	GAU	JACCARD	BOOT	0.91	0.69	0.69	0.74	0.85
	MXD	JACCARD	BOOT	0.94	0.73	0.73	0.78	0.87
	RDF	JACCARD	BOOT	0.93	0.73	0.73	0.77	0.87
	SUP	JACCARD	BOOT	0.94	0.74	0.74	0.78	0.88
	SVM	JACCARD	BOOT	0.93	0.72	0.72	0.77	0.87
Phyllostomus discolor	GAU	JACCARD	BOOT	0.88	0.60	0.60	0.68	0.81
	MXD	JACCARD	BOOT	0.88	0.59	0.59	0.67	0.80
	RDF	JACCARD	BOOT	0.92	0.69	0.69	0.74	0.85
	SUP	JACCARD	BOOT	0.92	0.68	0.68	0.74	0.85
	SVM	JACCARD	BOOT	0.89	0.67	0.67	0.73	0.84
Phyllostomus elongatus	GAU	JACCARD	BOOT	0.89	0.65	0.65	0.73	0.84
	MXD	JACCARD	BOOT	0.89	0.64	0.64	0.72	0.84
	RDF	JACCARD	BOOT	0.90	0.68	0.68	0.75	0.86
	SUP	JACCARD	BOOT	0.91	0.71	0.71	0.76	0.86
	SVM	JACCARD	BOOT	0.87	0.65	0.65	0.73	0.84
Phyllostomus hastatus	GAU	JACCARD	BOOT	0.79	0.48	0.48	0.65	0.79
	MXD	JACCARD	BOOT	0.85	0.57	0.57	0.68	0.81
	RDF	JACCARD	BOOT	0.87	0.60	0.60	0.70	0.82
	SUP	JACCARD	BOOT	0.87	0.59	0.59	0.69	0.82
	SVM	JACCARD	BOOT	0.83	0.55	0.55	0.67	0.80
Phyllostomus latifolius	GAU	JACCARD	BOOT	0.96	0.87	0.87	0.89	0.94
	MXD	JACCARD	BOOT	0.97	0.96	0.96	0.96	0.98
	RDF	JACCARD	BOOT	0.96	0.84	0.84	0.86	0.92
	SUP	JACCARD	BOOT	0.98	0.91	0.91	0.93	0.96
	SVM	JACCARD	BOOT	0.89	0.74	0.74	0.79	0.88
Platyrrhinus angustirostris	GAU	JACCARD	BOOT	0.83	0.59	0.59	0.70	0.82
	MXD	JACCARD	BOOT	0.72	0.49	0.49	0.66	0.80
	RDF	JACCARD	BOOT	0.76	0.50	0.50	0.67	0.80
	SUP	JACCARD	BOOT	0.80	0.58	0.58	0.70	0.82
	SVM	JACCARD	BOOT	0.73	0.48	0.48	0.65	0.79
Platyrrhinus aurarius	GAU	JACCARD	BOOT	0.85	0.68	0.68	0.75	0.86
	MXD	JACCARD	BOOT	0.83	0.68	0.68	0.76	0.86
	RDF	JACCARD	BOOT	0.83	0.64	0.64	0.73	0.84
	SUP	JACCARD	BOOT	0.86	0.80	0.80	0.83	0.91
	SVM	JACCARD	BOOT	0.75	0.56	0.56	0.68	0.81
Platyrrhinus brachycephalus	GAU	JACCARD	BOOT	0.91	0.74	0.74	0.78	0.88
	MXD	JACCARD	BOOT	0.91	0.77	0.77	0.80	0.89
	RDF	JACCARD	BOOT	0.91	0.77	0.77	0.80	0.89
	SUP	JACCARD	BOOT	0.92	0.78	0.78	0.82	0.90
	SVM	JACCARD	BOOT	0.90	0.72	0.72	0.77	0.87
Platyrrhinus fusciventris	GAU	JACCARD	BOOT	0.95	0.83	0.83	0.86	0.92
	MXD	JACCARD	BOOT	0.95	0.81	0.81	0.83	0.91
	RDF	JACCARD	BOOT	0.95	0.86	0.86	0.88	0.94
	SUP	JACCARD	BOOT	0.96	0.88	0.88	0.89	0.94
	SVM	JACCARD	BOOT	0.91	0.78	0.78	0.82	0.90
Platyrrhinus incarum	GAU	JACCARD	BOOT	0.71	0.54	0.54	0.65	0.79
	MXD	JACCARD	BOOT	0.78	0.41	0.41	0.62	0.77
	RDF	JACCARD	BOOT	0.79	0.59	0.59	0.67	0.80
	SUP	JACCARD	BOOT	0.79	0.59	0.59	0.67	0.80
	SVM	JACCARD	BOOT	0.75	0.51	0.51	0.64	0.78
Platyrrhinus infuscus	GAU	JACCARD	BOOT	0.96	0.87	0.87	0.89	0.94
	MXD	JACCARD	BOOT	0.94	0.89	0.89	0.90	0.95
	RDF	JACCARD	BOOT	0.94	0.82	0.82	0.84	0.91
	SUP	JACCARD	BOOT	0.96	0.90	0.90	0.91	0.95
	SVM	JACCARD	BOOT	0.96	0.86	0.86	0.86	0.93
Platyrrhinus lineatus	GAU	JACCARD	BOOT	0.84	0.55	0.55	0.68	0.81
	MXD	JACCARD	BOOT	0.84	0.55	0.55	0.67	0.81
	RDF	JACCARD	BOOT	0.85	0.56	0.56	0.68	0.81
	SUP	JACCARD	BOOT	0.86	0.60	0.60	0.70	0.82
	SVM	JACCARD	BOOT	0.84	0.60	0.60	0.70	0.82
Platyrrhinus recifinus	GAU	JACCARD	BOOT	0.88	0.76	0.76	0.80	0.88
	MXD	JACCARD	BOOT	0.87	0.78	0.78	0.80	0.89
	RDF	JACCARD	BOOT	0.87	0.83	0.83	0.84	0.91
	SUP	JACCARD	BOOT	0.90	0.86	0.86	0.88	0.93
	SVM	JACCARD	BOOT	0.88	0.74	0.74	0.77	0.87
Promops centralis	GAU	JACCARD	BOOT	0.72	0.43	0.43	0.61	0.76
	MXD	JACCARD	BOOT	0.72	0.36	0.36	0.58	0.73
	RDF	JACCARD	BOOT	0.76	0.48	0.48	0.63	0.77
	SUP	JACCARD	BOOT	0.75	0.46	0.46	0.63	0.77
	SVM	JACCARD	BOOT	0.69	0.40	0.40	0.59	0.74
Promops nasutus	GAU	JACCARD	BOOT	0.60	0.23	0.23	0.56	0.72
	MXD	JACCARD	BOOT	0.75	0.49	0.49	0.63	0.77
	RDF	JACCARD	BOOT	0.71	0.36	0.36	0.60	0.75
	SUP	JACCARD	BOOT	0.76	0.46	0.46	0.63	0.77
	SVM	JACCARD	BOOT	0.66	0.33	0.33	0.59	0.74
Pteronotus alitonus	GAU	JACCARD	BOOT	0.90	0.78	0.78	0.82	0.90
	MXD	JACCARD	BOOT	0.93	0.89	0.89	0.90	0.95
	RDF	JACCARD	BOOT	0.90	0.89	0.89	0.90	0.95
	SUP	JACCARD	BOOT	0.92	0.89	0.89	0.90	0.95
	SVM	JACCARD	BOOT	0.87	0.74	0.74	0.79	0.88
Pteronotus gymnonotus	GAU	JACCARD	BOOT	0.90	0.69	0.69	0.76	0.86
	MXD	JACCARD	BOOT	0.89	0.72	0.72	0.78	0.88
	RDF	JACCARD	BOOT	0.93	0.74	0.74	0.79	0.88
	SUP	JACCARD	BOOT	0.92	0.76	0.76	0.80	0.89
	SVM	JACCARD	BOOT	0.91	0.75	0.75	0.79	0.88
Pteronotus personatus	GAU	JACCARD	BOOT	0.94	0.80	0.80	0.82	0.90
	MXD	JACCARD	BOOT	0.95	0.79	0.79	0.82	0.90
	RDF	JACCARD	BOOT	0.96	0.83	0.83	0.85	0.92
	SUP	JACCARD	BOOT	0.96	0.83	0.83	0.85	0.92
	SVM	JACCARD	BOOT	0.94	0.79	0.79	0.81	0.90
Pteronotus rubiginosus	GAU	JACCARD	BOOT	0.89	0.76	0.76	0.77	0.87
	MXD	JACCARD	BOOT	0.91	0.75	0.75	0.78	0.87
	RDF	JACCARD	BOOT	0.94	0.83	0.83	0.84	0.91
	SUP	JACCARD	BOOT	0.92	0.83	0.83	0.84	0.91
	SVM	JACCARD	BOOT	0.89	0.75	0.75	0.77	0.87
Pygoderma bilabiatum	GAU	JACCARD	BOOT	0.85	0.71	0.71	0.77	0.87
	MXD	JACCARD	BOOT	0.88	0.73	0.73	0.78	0.87
	RDF	JACCARD	BOOT	0.87	0.74	0.74	0.79	0.88
	SUP	JACCARD	BOOT	0.87	0.76	0.76	0.80	0.89
	SVM	JACCARD	BOOT	0.87	0.72	0.72	0.77	0.87
Rhinophylla fischerae	GAU	JACCARD	BOOT	0.84	0.60	0.60	0.71	0.83
	MXD	JACCARD	BOOT	0.81	0.56	0.56	0.69	0.82
	RDF	JACCARD	BOOT	0.89	0.64	0.64	0.72	0.84
	SUP	JACCARD	BOOT	0.89	0.67	0.67	0.74	0.85
	SVM	JACCARD	BOOT	0.85	0.64	0.64	0.72	0.84
Rhinophylla pumilio	GAU	JACCARD	BOOT	0.84	0.61	0.61	0.68	0.81
	MXD	JACCARD	BOOT	0.86	0.62	0.62	0.70	0.82
	RDF	JACCARD	BOOT	0.93	0.75	0.75	0.78	0.88
	SUP	JACCARD	BOOT	0.92	0.73	0.73	0.77	0.87
	SVM	JACCARD	BOOT	0.87	0.60	0.60	0.70	0.82
Rhogeessa hussoni	GAU	JACCARD	BOOT	0.80	0.58	0.58	0.71	0.83
	MXD	JACCARD	BOOT	0.81	0.75	0.75	0.80	0.89
	RDF	JACCARD	BOOT	0.79	0.65	0.65	0.72	0.84
	SUP	JACCARD	BOOT	0.84	0.78	0.78	0.82	0.90
	SVM	JACCARD	BOOT	0.80	0.63	0.63	0.72	0.83
Rhogeessa io	GAU	JACCARD	BOOT	0.98	0.91	0.91	0.92	0.96
	MXD	JACCARD	BOOT	0.97	0.91	0.91	0.92	0.96
	RDF	JACCARD	BOOT	0.97	0.92	0.92	0.93	0.96
	SUP	JACCARD	BOOT	0.98	0.94	0.94	0.94	0.97
	SVM	JACCARD	BOOT	0.99	0.93	0.93	0.93	0.96
Rhynchonycteris naso	GAU	JACCARD	BOOT	0.85	0.55	0.55	0.68	0.81
	MXD	JACCARD	BOOT	0.86	0.61	0.61	0.71	0.83
	RDF	JACCARD	BOOT	0.89	0.64	0.64	0.71	0.83
	SUP	JACCARD	BOOT	0.89	0.65	0.65	0.71	0.83
	SVM	JACCARD	BOOT	0.87	0.59	0.59	0.70	0.82
Saccopteryx bilineata	GAU	JACCARD	BOOT	0.92	0.72	0.72	0.76	0.86
	MXD	JACCARD	BOOT	0.92	0.69	0.69	0.75	0.86
	RDF	JACCARD	BOOT	0.94	0.74	0.74	0.78	0.88
	SUP	JACCARD	BOOT	0.94	0.73	0.73	0.78	0.88
	SVM	JACCARD	BOOT	0.92	0.69	0.69	0.75	0.86
Saccopteryx canescens	GAU	JACCARD	BOOT	0.95	0.82	0.82	0.84	0.92
	MXD	JACCARD	BOOT	0.93	0.81	0.81	0.83	0.91
	RDF	JACCARD	BOOT	0.92	0.80	0.80	0.83	0.91
	SUP	JACCARD	BOOT	0.94	0.85	0.85	0.87	0.93
	SVM	JACCARD	BOOT	0.93	0.81	0.81	0.84	0.91
Saccopteryx gymnura	GAU	JACCARD	BOOT	0.95	0.90	0.90	0.93	0.96
	MXD	JACCARD	BOOT	1.00	1.00	1.00	1.00	1.00
	RDF	JACCARD	BOOT	0.95	0.90	0.90	0.93	0.96
	SUP	JACCARD	BOOT	0.90	0.80	0.80	0.90	0.93
	SVM	JACCARD	BOOT	0.40	0.20	0.20	0.60	0.73
Saccopteryx leptura	GAU	JACCARD	BOOT	0.89	0.66	0.66	0.73	0.85
	MXD	JACCARD	BOOT	0.89	0.66	0.66	0.73	0.85
	RDF	JACCARD	BOOT	0.91	0.69	0.69	0.75	0.86
	SUP	JACCARD	BOOT	0.91	0.70	0.70	0.75	0.86
	SVM	JACCARD	BOOT	0.90	0.66	0.66	0.73	0.84
Sphaeronycteris toxophyllum	GAU	JACCARD	BOOT	0.94	0.85	0.85	0.87	0.93
	MXD	JACCARD	BOOT	0.95	0.82	0.82	0.85	0.92
	RDF	JACCARD	BOOT	0.97	0.85	0.85	0.87	0.93
	SUP	JACCARD	BOOT	0.97	0.85	0.85	0.87	0.93
	SVM	JACCARD	BOOT	0.91	0.74	0.74	0.79	0.88
Sturnira giannae	GAU	JACCARD	BOOT	0.81	0.64	0.64	0.73	0.84
	MXD	JACCARD	BOOT	0.77	0.52	0.52	0.67	0.80
	RDF	JACCARD	BOOT	0.79	0.64	0.64	0.72	0.84
	SUP	JACCARD	BOOT	0.80	0.64	0.64	0.72	0.84
	SVM	JACCARD	BOOT	0.77	0.61	0.61	0.71	0.83
Sturnira lilium	GAU	JACCARD	BOOT	0.79	0.48	0.48	0.64	0.78
	MXD	JACCARD	BOOT	0.80	0.43	0.43	0.61	0.75
	RDF	JACCARD	BOOT	0.88	0.61	0.61	0.70	0.82
	SUP	JACCARD	BOOT	0.87	0.59	0.59	0.69	0.81
	SVM	JACCARD	BOOT	0.81	0.52	0.52	0.65	0.79
Sturnira magna	GAU	JACCARD	BOOT	0.96	0.86	0.86	0.87	0.93
	MXD	JACCARD	BOOT	0.98	0.88	0.88	0.89	0.94
	RDF	JACCARD	BOOT	0.97	0.89	0.89	0.90	0.95
	SUP	JACCARD	BOOT	0.98	0.90	0.90	0.91	0.95
	SVM	JACCARD	BOOT	0.94	0.83	0.83	0.85	0.92
Sturnira tildae	GAU	JACCARD	BOOT	0.84	0.58	0.58	0.69	0.82
	MXD	JACCARD	BOOT	0.87	0.66	0.66	0.73	0.84
	RDF	JACCARD	BOOT	0.89	0.64	0.64	0.73	0.84
	SUP	JACCARD	BOOT	0.88	0.64	0.64	0.72	0.84
	SVM	JACCARD	BOOT	0.85	0.60	0.60	0.69	0.82
Tadarida brasiliensis	GAU	JACCARD	BOOT	0.90	0.65	0.65	0.72	0.84
	MXD	JACCARD	BOOT	0.89	0.60	0.60	0.68	0.81
	RDF	JACCARD	BOOT	0.93	0.72	0.72	0.76	0.86
	SUP	JACCARD	BOOT	0.93	0.71	0.71	0.76	0.86
	SVM	JACCARD	BOOT	0.90	0.69	0.69	0.75	0.86
Thyroptera devivoi	GAU	JACCARD	BOOT	0.79	0.67	0.67	0.75	0.86
	MXD	JACCARD	BOOT	0.87	0.70	0.70	0.78	0.87
	RDF	JACCARD	BOOT	0.69	0.67	0.67	0.75	0.86
	SUP	JACCARD	BOOT	0.84	0.77	0.77	0.83	0.90
	SVM	JACCARD	BOOT	0.86	0.73	0.73	0.80	0.89
Thyroptera discifera	GAU	JACCARD	BOOT	0.84	0.63	0.63	0.73	0.84
	MXD	JACCARD	BOOT	0.90	0.73	0.73	0.79	0.88
	RDF	JACCARD	BOOT	0.87	0.71	0.71	0.75	0.85
	SUP	JACCARD	BOOT	0.90	0.71	0.71	0.79	0.88
	SVM	JACCARD	BOOT	0.75	0.40	0.40	0.63	0.77
Thyroptera lavali	GAU	JACCARD	BOOT	0.95	0.84	0.84	0.87	0.93
	MXD	JACCARD	BOOT	0.96	0.87	0.87	0.89	0.94
	RDF	JACCARD	BOOT	0.93	0.74	0.74	0.79	0.88
	SUP	JACCARD	BOOT	0.96	0.86	0.86	0.88	0.93
	SVM	JACCARD	BOOT	0.91	0.80	0.80	0.84	0.91
Thyroptera tricolor	GAU	JACCARD	BOOT	0.75	0.41	0.41	0.62	0.77
	MXD	JACCARD	BOOT	0.76	0.40	0.40	0.62	0.76
	RDF	JACCARD	BOOT	0.80	0.51	0.51	0.66	0.79
	SUP	JACCARD	BOOT	0.80	0.51	0.51	0.66	0.79
	SVM	JACCARD	BOOT	0.69	0.43	0.43	0.63	0.77
Thyroptera wynneae	GAU	JACCARD	BOOT	0.93	0.83	0.83	0.88	0.93
	MXD	JACCARD	BOOT	1.00	1.00	1.00	1.00	1.00
	RDF	JACCARD	BOOT	0.91	0.83	0.83	0.88	0.93
	SUP	JACCARD	BOOT	0.98	0.97	0.97	0.98	0.99
	SVM	JACCARD	BOOT	0.81	0.73	0.73	0.84	0.90
Tonatia bidens	GAU	JACCARD	BOOT	0.67	0.37	0.37	0.61	0.75
	MXD	JACCARD	BOOT	0.78	0.48	0.48	0.65	0.79
	RDF	JACCARD	BOOT	0.71	0.37	0.37	0.60	0.75
	SUP	JACCARD	BOOT	0.76	0.48	0.48	0.65	0.79
	SVM	JACCARD	BOOT	0.65	0.38	0.38	0.59	0.74
Trachops cirrhosus	GAU	JACCARD	BOOT	0.82	0.43	0.43	0.61	0.76
	MXD	JACCARD	BOOT	0.82	0.46	0.46	0.62	0.77
	RDF	JACCARD	BOOT	0.86	0.58	0.58	0.68	0.81
	SUP	JACCARD	BOOT	0.86	0.58	0.58	0.69	0.81
	SVM	JACCARD	BOOT	0.82	0.54	0.54	0.67	0.80
Trinycteris nicefori	GAU	JACCARD	BOOT	0.75	0.49	0.49	0.66	0.79
	MXD	JACCARD	BOOT	0.79	0.51	0.51	0.66	0.80
	RDF	JACCARD	BOOT	0.80	0.49	0.49	0.66	0.79
	SUP	JACCARD	BOOT	0.79	0.51	0.51	0.67	0.80
	SVM	JACCARD	BOOT	0.76	0.50	0.50	0.66	0.80
Uroderma bilobatum	GAU	JACCARD	BOOT	0.88	0.65	0.65	0.74	0.85
	MXD	JACCARD	BOOT	0.89	0.66	0.66	0.74	0.85
	RDF	JACCARD	BOOT	0.91	0.73	0.73	0.78	0.88
	SUP	JACCARD	BOOT	0.91	0.73	0.73	0.78	0.88
	SVM	JACCARD	BOOT	0.88	0.68	0.68	0.75	0.86
Uroderma magnirostrum	GAU	JACCARD	BOOT	0.81	0.51	0.51	0.64	0.78
	MXD	JACCARD	BOOT	0.83	0.56	0.56	0.67	0.80
	RDF	JACCARD	BOOT	0.89	0.65	0.65	0.71	0.83
	SUP	JACCARD	BOOT	0.88	0.68	0.68	0.73	0.84
	SVM	JACCARD	BOOT	0.82	0.50	0.50	0.63	0.77
Vampyressa pusilla	GAU	JACCARD	BOOT	0.83	0.45	0.45	0.62	0.76
	MXD	JACCARD	BOOT	0.86	0.56	0.56	0.66	0.79
	RDF	JACCARD	BOOT	0.89	0.65	0.65	0.72	0.84
	SUP	JACCARD	BOOT	0.89	0.63	0.63	0.71	0.83
	SVM	JACCARD	BOOT	0.82	0.50	0.50	0.65	0.78
Vampyressa thyone	GAU	JACCARD	BOOT	0.89	0.71	0.71	0.77	0.87
	MXD	JACCARD	BOOT	0.91	0.70	0.70	0.76	0.86
	RDF	JACCARD	BOOT	0.91	0.75	0.75	0.80	0.89
	SUP	JACCARD	BOOT	0.91	0.74	0.74	0.79	0.88
	SVM	JACCARD	BOOT	0.89	0.69	0.69	0.75	0.86
Vampyriscus bidens	GAU	JACCARD	BOOT	0.92	0.81	0.81	0.84	0.91
	MXD	JACCARD	BOOT	0.95	0.83	0.83	0.86	0.92
	RDF	JACCARD	BOOT	0.95	0.87	0.87	0.88	0.94
	SUP	JACCARD	BOOT	0.95	0.84	0.84	0.86	0.93
	SVM	JACCARD	BOOT	0.91	0.76	0.76	0.80	0.89
Vampyriscus brocki	GAU	JACCARD	BOOT	0.93	0.82	0.82	0.85	0.92
	MXD	JACCARD	BOOT	0.88	0.73	0.73	0.79	0.88
	RDF	JACCARD	BOOT	0.87	0.78	0.78	0.82	0.90
	SUP	JACCARD	BOOT	0.92	0.85	0.85	0.87	0.93
	SVM	JACCARD	BOOT	0.93	0.85	0.85	0.87	0.93
Vampyrodes caraccioli	GAU	JACCARD	BOOT	0.83	0.62	0.62	0.71	0.83
	MXD	JACCARD	BOOT	0.83	0.54	0.54	0.67	0.80
	RDF	JACCARD	BOOT	0.85	0.65	0.65	0.74	0.85
	SUP	JACCARD	BOOT	0.84	0.66	0.66	0.74	0.85
	SVM	JACCARD	BOOT	0.84	0.60	0.60	0.70	0.83
Vampyrum spectrum	GAU	JACCARD	BOOT	0.80	0.57	0.57	0.70	0.82
	MXD	JACCARD	BOOT	0.85	0.63	0.63	0.72	0.84
	RDF	JACCARD	BOOT	0.81	0.60	0.60	0.71	0.83
	SUP	JACCARD	BOOT	0.85	0.65	0.65	0.73	0.85
	SVM	JACCARD	BOOT	0.75	0.54	0.54	0.69	0.81
Ametrida centurio	MXD	BLOCK	JACCARD	0.96	0.86	0.86	0.87	0.93
	SVM	BLOCK	JACCARD	0.96	0.83	0.83	0.86	0.92
	RDF	BLOCK	JACCARD	0.97	0.91	0.91	0.91	0.95
	GAU	BLOCK	JACCARD	0.97	0.91	0.91	0.91	0.95
	SUP	BLOCK	JACCARD	0.97	0.92	0.92	0.92	0.96
Anoura caudifer	MXD	BLOCK	JACCARD	0.90	0.68	0.68	0.73	0.84
	SVM	BLOCK	JACCARD	0.84	0.55	0.55	0.68	0.81
	RDF	BLOCK	JACCARD	0.89	0.63	0.63	0.71	0.83
	GAU	BLOCK	JACCARD	0.87	0.63	0.63	0.70	0.82
	SUP	BLOCK	JACCARD	0.90	0.64	0.64	0.72	0.84
Anoura geoffroyi	MXD	BLOCK	JACCARD	0.84	0.54	0.54	0.65	0.79
	SVM	BLOCK	JACCARD	0.85	0.58	0.58	0.68	0.81
	RDF	BLOCK	JACCARD	0.85	0.51	0.51	0.65	0.79
	GAU	BLOCK	JACCARD	0.85	0.60	0.60	0.68	0.81
	SUP	BLOCK	JACCARD	0.85	0.60	0.60	0.68	0.81
Artibeus anderseni	MXD	BLOCK	JACCARD	0.88	0.67	0.67	0.74	0.85
	SVM	BLOCK	JACCARD	0.87	0.70	0.70	0.76	0.86
	RDF	BLOCK	JACCARD	0.89	0.77	0.77	0.81	0.90
	GAU	BLOCK	JACCARD	0.88	0.75	0.75	0.80	0.89
	SUP	BLOCK	JACCARD	0.89	0.78	0.78	0.82	0.90
Artibeus bogotensis	MXD	BLOCK	JACCARD	0.89	0.74	0.74	0.79	0.88
	SVM	BLOCK	JACCARD	0.83	0.60	0.60	0.71	0.83
	RDF	BLOCK	JACCARD	0.90	0.77	0.77	0.81	0.90
	GAU	BLOCK	JACCARD	0.88	0.76	0.76	0.80	0.89
	SUP	BLOCK	JACCARD	0.90	0.78	0.78	0.82	0.90
Artibeus cinereus	MXD	BLOCK	JACCARD	0.83	0.53	0.53	0.66	0.79
	SVM	BLOCK	JACCARD	0.79	0.47	0.47	0.64	0.78
	RDF	BLOCK	JACCARD	0.79	0.47	0.47	0.63	0.77
	GAU	BLOCK	JACCARD	0.75	0.37	0.37	0.61	0.76
	SUP	BLOCK	JACCARD	0.82	0.53	0.53	0.67	0.80
Artibeus concolor	MXD	BLOCK	JACCARD	0.94	0.82	0.82	0.84	0.92
	SVM	BLOCK	JACCARD	0.86	0.74	0.74	0.79	0.88
	RDF	BLOCK	JACCARD	0.90	0.73	0.73	0.78	0.87
	GAU	BLOCK	JACCARD	0.88	0.75	0.75	0.79	0.88
	SUP	BLOCK	JACCARD	0.94	0.82	0.82	0.84	0.92
Artibeus fimbriatus	MXD	BLOCK	JACCARD	0.88	0.66	0.66	0.73	0.84
	SVM	BLOCK	JACCARD	0.79	0.53	0.53	0.64	0.78
	RDF	BLOCK	JACCARD	0.87	0.60	0.60	0.70	0.82
	GAU	BLOCK	JACCARD	0.83	0.52	0.52	0.68	0.81
	SUP	BLOCK	JACCARD	0.90	0.72	0.72	0.77	0.87
Artibeus gnomus	MXD	BLOCK	JACCARD	0.82	0.59	0.59	0.69	0.82
	SVM	BLOCK	JACCARD	0.84	0.67	0.67	0.72	0.84
	RDF	BLOCK	JACCARD	0.85	0.66	0.66	0.73	0.84
	GAU	BLOCK	JACCARD	0.85	0.65	0.65	0.73	0.84
	SUP	BLOCK	JACCARD	0.87	0.66	0.66	0.72	0.84
Artibeus lituratus	MXD	BLOCK	JACCARD	0.81	0.47	0.47	0.63	0.77
	SVM	BLOCK	JACCARD	0.85	0.56	0.56	0.67	0.80
	RDF	BLOCK	JACCARD	0.87	0.61	0.61	0.70	0.82
	GAU	BLOCK	JACCARD	0.84	0.54	0.54	0.66	0.79
	SUP	BLOCK	JACCARD	0.87	0.60	0.60	0.69	0.82
Artibeus obscurus	MXD	BLOCK	JACCARD	0.87	0.56	0.56	0.69	0.81
	SVM	BLOCK	JACCARD	0.83	0.54	0.54	0.67	0.80
	RDF	BLOCK	JACCARD	0.87	0.62	0.62	0.71	0.83
	GAU	BLOCK	JACCARD	0.84	0.57	0.57	0.67	0.81
	SUP	BLOCK	JACCARD	0.87	0.63	0.63	0.72	0.83
Artibeus planirostris	MXD	BLOCK	JACCARD	0.77	0.39	0.39	0.61	0.76
	SVM	BLOCK	JACCARD	0.75	0.44	0.44	0.62	0.76
	RDF	BLOCK	JACCARD	0.78	0.44	0.44	0.63	0.77
	GAU	BLOCK	JACCARD	0.74	0.44	0.44	0.62	0.77
	SUP	BLOCK	JACCARD	0.77	0.46	0.46	0.63	0.78
Carollia brevicaudum	MXD	BLOCK	JACCARD	0.88	0.62	0.62	0.71	0.83
	SVM	BLOCK	JACCARD	0.86	0.60	0.60	0.70	0.82
	RDF	BLOCK	JACCARD	0.88	0.64	0.64	0.72	0.84
	GAU	BLOCK	JACCARD	0.87	0.63	0.63	0.72	0.83
	SUP	BLOCK	JACCARD	0.89	0.64	0.64	0.72	0.84
Carollia perspicillata	MXD	BLOCK	JACCARD	0.76	0.38	0.38	0.61	0.75
	SVM	BLOCK	JACCARD	0.78	0.44	0.44	0.63	0.77
	RDF	BLOCK	JACCARD	0.83	0.52	0.52	0.65	0.79
	GAU	BLOCK	JACCARD	0.76	0.40	0.40	0.62	0.76
	SUP	BLOCK	JACCARD	0.82	0.49	0.49	0.65	0.79
Chiroderma doriae	MXD	BLOCK	JACCARD	0.79	0.79	0.79	0.79	0.86
	SVM	BLOCK	JACCARD	0.66	0.15	0.15	0.55	0.70
	RDF	BLOCK	JACCARD	0.55	0.23	0.23	0.57	0.72
	GAU	BLOCK	JACCARD	0.54	0.19	0.19	0.55	0.71
	SUP	BLOCK	JACCARD	0.79	0.79	0.79	0.79	0.86
Chiroderma trinitatum	MXD	BLOCK	JACCARD	0.85	0.63	0.63	0.71	0.83
	SVM	BLOCK	JACCARD	0.80	0.51	0.51	0.65	0.79
	RDF	BLOCK	JACCARD	0.88	0.65	0.65	0.74	0.85
	GAU	BLOCK	JACCARD	0.86	0.65	0.65	0.74	0.85
	SUP	BLOCK	JACCARD	0.87	0.66	0.66	0.74	0.85
Chiroderma villosum	MXD	BLOCK	JACCARD	0.82	0.49	0.49	0.65	0.79
	SVM	BLOCK	JACCARD	0.79	0.55	0.55	0.67	0.80
	RDF	BLOCK	JACCARD	0.80	0.52	0.52	0.66	0.80
	GAU	BLOCK	JACCARD	0.79	0.53	0.53	0.66	0.80
	SUP	BLOCK	JACCARD	0.81	0.54	0.54	0.67	0.80
Choeroniscus godmani	MXD	BLOCK	JACCARD	0.92	0.76	0.76	0.79	0.88
	SVM	BLOCK	JACCARD	0.93	0.79	0.79	0.83	0.90
	RDF	BLOCK	JACCARD	0.94	0.82	0.82	0.84	0.91
	GAU	BLOCK	JACCARD	0.93	0.81	0.81	0.83	0.91
	SUP	BLOCK	JACCARD	0.95	0.83	0.83	0.85	0.92
Choeroniscus minor	MXD	BLOCK	JACCARD	0.80	0.64	0.64	0.73	0.84
	SVM	BLOCK	JACCARD	0.73	0.44	0.44	0.63	0.78
	RDF	BLOCK	JACCARD	0.82	0.64	0.64	0.71	0.83
	GAU	BLOCK	JACCARD	0.75	0.58	0.58	0.70	0.83
	SUP	BLOCK	JACCARD	0.79	0.60	0.60	0.71	0.83
Chrotopterus auritus	MXD	BLOCK	JACCARD	0.77	0.40	0.40	0.61	0.76
	SVM	BLOCK	JACCARD	0.76	0.31	0.31	0.59	0.74
	RDF	BLOCK	JACCARD	0.76	0.31	0.31	0.58	0.74
	GAU	BLOCK	JACCARD	0.75	0.34	0.34	0.59	0.75
	SUP	BLOCK	JACCARD	0.77	0.39	0.39	0.61	0.76
Cormura brevirostris	MXD	BLOCK	JACCARD	0.84	0.66	0.66	0.74	0.85
	SVM	BLOCK	JACCARD	0.84	0.66	0.66	0.74	0.85
	RDF	BLOCK	JACCARD	0.84	0.68	0.68	0.76	0.86
	GAU	BLOCK	JACCARD	0.85	0.69	0.69	0.76	0.86
	SUP	BLOCK	JACCARD	0.84	0.69	0.69	0.76	0.86
Cynomops abrasus	MXD	BLOCK	JACCARD	0.82	0.52	0.52	0.66	0.79
	SVM	BLOCK	JACCARD	0.86	0.66	0.66	0.72	0.84
	RDF	BLOCK	JACCARD	0.85	0.60	0.60	0.70	0.82
	GAU	BLOCK	JACCARD	0.85	0.63	0.63	0.73	0.85
	SUP	BLOCK	JACCARD	0.88	0.68	0.68	0.75	0.86
Cynomops planirostris	MXD	BLOCK	JACCARD	0.77	0.53	0.53	0.68	0.81
	SVM	BLOCK	JACCARD	0.70	0.41	0.41	0.61	0.76
	RDF	BLOCK	JACCARD	0.78	0.43	0.43	0.62	0.77
	GAU	BLOCK	JACCARD	0.73	0.37	0.37	0.62	0.76
	SUP	BLOCK	JACCARD	0.77	0.53	0.53	0.68	0.81
Dasypterus ega	MXD	BLOCK	JACCARD	0.68	0.24	0.24	0.55	0.71
	SVM	BLOCK	JACCARD	0.61	0.18	0.18	0.53	0.70
	RDF	BLOCK	JACCARD	0.65	0.22	0.22	0.55	0.71
	GAU	BLOCK	JACCARD	0.63	0.23	0.23	0.56	0.72
	SUP	BLOCK	JACCARD	0.67	0.26	0.26	0.57	0.73
Desmodus rotundus	MXD	BLOCK	JACCARD	0.83	0.50	0.50	0.64	0.78
	SVM	BLOCK	JACCARD	0.83	0.54	0.54	0.65	0.79
	RDF	BLOCK	JACCARD	0.84	0.54	0.54	0.65	0.79
	GAU	BLOCK	JACCARD	0.83	0.51	0.51	0.64	0.78
	SUP	BLOCK	JACCARD	0.84	0.55	0.55	0.66	0.80
Diaemus youngii	MXD	BLOCK	JACCARD	0.66	0.32	0.32	0.58	0.73
	SVM	BLOCK	JACCARD	0.71	0.33	0.33	0.59	0.74
	RDF	BLOCK	JACCARD	0.66	0.39	0.39	0.56	0.72
	GAU	BLOCK	JACCARD	0.72	0.39	0.39	0.60	0.75
	SUP	BLOCK	JACCARD	0.70	0.47	0.47	0.61	0.76
Diclidurus albus	MXD	BLOCK	JACCARD	0.79	0.57	0.57	0.70	0.82
	SVM	BLOCK	JACCARD	0.71	0.49	0.49	0.65	0.79
	RDF	BLOCK	JACCARD	0.76	0.49	0.49	0.65	0.79
	GAU	BLOCK	JACCARD	0.80	0.60	0.60	0.71	0.83
	SUP	BLOCK	JACCARD	0.80	0.60	0.60	0.71	0.83
Diphylla ecaudata	MXD	BLOCK	JACCARD	0.89	0.61	0.61	0.69	0.82
	SVM	BLOCK	JACCARD	0.84	0.51	0.51	0.67	0.80
	RDF	BLOCK	JACCARD	0.88	0.63	0.63	0.71	0.83
	GAU	BLOCK	JACCARD	0.84	0.50	0.50	0.67	0.80
	SUP	BLOCK	JACCARD	0.89	0.65	0.65	0.72	0.83
Eptesicus brasiliensis	MXD	BLOCK	JACCARD	0.66	0.23	0.23	0.54	0.70
	SVM	BLOCK	JACCARD	0.68	0.33	0.33	0.57	0.73
	RDF	BLOCK	JACCARD	0.73	0.41	0.41	0.59	0.74
	GAU	BLOCK	JACCARD	0.71	0.34	0.34	0.58	0.73
	SUP	BLOCK	JACCARD	0.73	0.40	0.40	0.59	0.74
Eptesicus chiriquinus	MXD	BLOCK	JACCARD	0.69	0.48	0.48	0.63	0.77
	SVM	BLOCK	JACCARD	0.67	0.31	0.31	0.59	0.74
	RDF	BLOCK	JACCARD	0.74	0.49	0.49	0.66	0.80
	GAU	BLOCK	JACCARD	0.74	0.58	0.58	0.70	0.82
	SUP	BLOCK	JACCARD	0.75	0.58	0.58	0.70	0.83
Eptesicus diminutus	MXD	BLOCK	JACCARD	0.68	0.28	0.28	0.59	0.74
	SVM	BLOCK	JACCARD	0.66	0.35	0.35	0.56	0.72
	RDF	BLOCK	JACCARD	0.78	0.52	0.52	0.67	0.80
	GAU	BLOCK	JACCARD	0.73	0.48	0.48	0.60	0.75
	SUP	BLOCK	JACCARD	0.77	0.54	0.54	0.64	0.78
Eptesicus furinalis	MXD	BLOCK	JACCARD	0.71	0.36	0.36	0.59	0.74
	SVM	BLOCK	JACCARD	0.67	0.24	0.24	0.57	0.72
	RDF	BLOCK	JACCARD	0.67	0.30	0.30	0.57	0.72
	GAU	BLOCK	JACCARD	0.69	0.31	0.31	0.59	0.74
	SUP	BLOCK	JACCARD	0.71	0.32	0.32	0.59	0.74
Eumops auripendulus	MXD	BLOCK	JACCARD	0.75	0.42	0.42	0.63	0.77
	SVM	BLOCK	JACCARD	0.66	0.35	0.35	0.58	0.74
	RDF	BLOCK	JACCARD	0.74	0.38	0.38	0.59	0.74
	GAU	BLOCK	JACCARD	0.70	0.37	0.37	0.59	0.74
	SUP	BLOCK	JACCARD	0.75	0.41	0.41	0.62	0.76
Eumops bonariensis	MXD	BLOCK	JACCARD	0.67	0.37	0.37	0.58	0.74
	SVM	BLOCK	JACCARD	0.63	0.25	0.25	0.56	0.72
	RDF	BLOCK	JACCARD	0.53	0.20	0.20	0.52	0.69
	GAU	BLOCK	JACCARD	0.61	0.21	0.21	0.54	0.70
	SUP	BLOCK	JACCARD	0.67	0.37	0.37	0.58	0.74
Eumops glaucinus	MXD	BLOCK	JACCARD	0.71	0.42	0.42	0.62	0.76
	SVM	BLOCK	JACCARD	0.65	0.16	0.16	0.54	0.70
	RDF	BLOCK	JACCARD	0.67	0.27	0.27	0.57	0.72
	GAU	BLOCK	JACCARD	0.68	0.31	0.31	0.58	0.74
	SUP	BLOCK	JACCARD	0.70	0.35	0.35	0.60	0.75
Eumops patagonicus	MXD	BLOCK	JACCARD	0.87	0.61	0.61	0.72	0.83
	SVM	BLOCK	JACCARD	0.78	0.55	0.55	0.62	0.77
	RDF	BLOCK	JACCARD	0.81	0.55	0.55	0.68	0.81
	GAU	BLOCK	JACCARD	0.75	0.54	0.54	0.62	0.76
	SUP	BLOCK	JACCARD	0.87	0.61	0.61	0.72	0.83
Eumops perotis	MXD	BLOCK	JACCARD	0.76	0.44	0.44	0.62	0.77
	SVM	BLOCK	JACCARD	0.72	0.33	0.33	0.58	0.73
	RDF	BLOCK	JACCARD	0.75	0.36	0.36	0.60	0.75
	GAU	BLOCK	JACCARD	0.73	0.35	0.35	0.58	0.74
	SUP	BLOCK	JACCARD	0.76	0.44	0.44	0.62	0.77
Furipterus horrens	MXD	BLOCK	JACCARD	0.81	0.55	0.55	0.67	0.80
	SVM	BLOCK	JACCARD	0.79	0.60	0.60	0.69	0.81
	RDF	BLOCK	JACCARD	0.83	0.58	0.58	0.65	0.79
	GAU	BLOCK	JACCARD	0.85	0.60	0.60	0.70	0.83
	SUP	BLOCK	JACCARD	0.83	0.53	0.53	0.67	0.80
Gardnerycteris crenulatum	MXD	BLOCK	JACCARD	0.81	0.55	0.55	0.68	0.81
	SVM	BLOCK	JACCARD	0.82	0.54	0.54	0.67	0.80
	RDF	BLOCK	JACCARD	0.85	0.56	0.56	0.67	0.80
	GAU	BLOCK	JACCARD	0.83	0.60	0.60	0.71	0.83
	SUP	BLOCK	JACCARD	0.83	0.60	0.60	0.71	0.83
Glossophaga commissarisi	MXD	BLOCK	JACCARD	0.96	0.87	0.87	0.89	0.94
	SVM	BLOCK	JACCARD	0.96	0.86	0.86	0.88	0.93
	RDF	BLOCK	JACCARD	0.96	0.88	0.88	0.89	0.94
	GAU	BLOCK	JACCARD	0.97	0.89	0.89	0.90	0.95
	SUP	BLOCK	JACCARD	0.97	0.89	0.89	0.90	0.95
Glossophaga longirostris	MXD	BLOCK	JACCARD	0.95	0.85	0.85	0.86	0.93
	SVM	BLOCK	JACCARD	0.87	0.60	0.60	0.70	0.83
	RDF	BLOCK	JACCARD	0.94	0.82	0.82	0.85	0.92
	GAU	BLOCK	JACCARD	0.95	0.81	0.81	0.83	0.91
	SUP	BLOCK	JACCARD	0.95	0.84	0.84	0.86	0.93
Glossophaga soricina	MXD	BLOCK	JACCARD	0.84	0.53	0.53	0.65	0.78
	SVM	BLOCK	JACCARD	0.85	0.56	0.56	0.67	0.80
	RDF	BLOCK	JACCARD	0.86	0.60	0.60	0.68	0.81
	GAU	BLOCK	JACCARD	0.85	0.56	0.56	0.66	0.80
	SUP	BLOCK	JACCARD	0.86	0.59	0.59	0.68	0.81
Glyphonycteris sylvestris	MXD	BLOCK	JACCARD	0.82	0.57	0.57	0.67	0.80
	SVM	BLOCK	JACCARD	0.87	0.70	0.70	0.77	0.87
	RDF	BLOCK	JACCARD	0.91	0.76	0.76	0.80	0.89
	GAU	BLOCK	JACCARD	0.90	0.76	0.76	0.79	0.88
	SUP	BLOCK	JACCARD	0.90	0.74	0.74	0.78	0.88
Histiotus montanus	MXD	BLOCK	JACCARD	0.71	0.38	0.38	0.61	0.76
	SVM	BLOCK	JACCARD	0.71	0.39	0.39	0.60	0.75
	RDF	BLOCK	JACCARD	0.69	0.34	0.34	0.60	0.75
	GAU	BLOCK	JACCARD	0.74	0.47	0.47	0.65	0.78
	SUP	BLOCK	JACCARD	0.74	0.47	0.47	0.65	0.78
Histiotus velatus	MXD	BLOCK	JACCARD	0.92	0.81	0.81	0.82	0.90
	SVM	BLOCK	JACCARD	0.93	0.75	0.75	0.78	0.88
	RDF	BLOCK	JACCARD	0.91	0.76	0.76	0.80	0.89
	GAU	BLOCK	JACCARD	0.92	0.78	0.78	0.80	0.89
	SUP	BLOCK	JACCARD	0.92	0.78	0.78	0.79	0.88
Hsunycteris thomasi	MXD	BLOCK	JACCARD	0.87	0.70	0.70	0.77	0.87
	SVM	BLOCK	JACCARD	0.81	0.55	0.55	0.67	0.80
	RDF	BLOCK	JACCARD	0.87	0.68	0.68	0.75	0.86
	GAU	BLOCK	JACCARD	0.85	0.66	0.66	0.74	0.85
	SUP	BLOCK	JACCARD	0.87	0.67	0.67	0.75	0.86
Lampronycteris brachyotis	MXD	BLOCK	JACCARD	0.70	0.35	0.35	0.58	0.73
	SVM	BLOCK	JACCARD	0.64	0.18	0.18	0.54	0.70
	RDF	BLOCK	JACCARD	0.74	0.45	0.45	0.64	0.78
	GAU	BLOCK	JACCARD	0.74	0.40	0.40	0.61	0.76
	SUP	BLOCK	JACCARD	0.75	0.39	0.39	0.62	0.76
Lasiurus blossevillii	MXD	BLOCK	JACCARD	0.73	0.31	0.31	0.58	0.74
	SVM	BLOCK	JACCARD	0.72	0.28	0.28	0.56	0.72
	RDF	BLOCK	JACCARD	0.76	0.36	0.36	0.58	0.73
	GAU	BLOCK	JACCARD	0.69	0.32	0.32	0.58	0.73
	SUP	BLOCK	JACCARD	0.75	0.39	0.39	0.58	0.73
Lionycteris spurrelli	MXD	BLOCK	JACCARD	0.87	0.61	0.61	0.72	0.83
	SVM	BLOCK	JACCARD	0.85	0.61	0.61	0.69	0.82
	RDF	BLOCK	JACCARD	0.89	0.69	0.69	0.75	0.86
	GAU	BLOCK	JACCARD	0.89	0.67	0.67	0.75	0.85
	SUP	BLOCK	JACCARD	0.89	0.66	0.66	0.74	0.85
Lonchorhina aurita	MXD	BLOCK	JACCARD	0.58	0.16	0.16	0.54	0.70
	SVM	BLOCK	JACCARD	0.56	0.22	0.22	0.52	0.69
	RDF	BLOCK	JACCARD	0.76	0.41	0.41	0.61	0.76
	GAU	BLOCK	JACCARD	0.65	0.31	0.31	0.56	0.72
	SUP	BLOCK	JACCARD	0.71	0.41	0.41	0.58	0.74
Lophostoma brasiliense	MXD	BLOCK	JACCARD	0.81	0.53	0.53	0.66	0.80
	SVM	BLOCK	JACCARD	0.73	0.39	0.39	0.57	0.73
	RDF	BLOCK	JACCARD	0.80	0.48	0.48	0.64	0.78
	GAU	BLOCK	JACCARD	0.80	0.50	0.50	0.65	0.79
	SUP	BLOCK	JACCARD	0.81	0.47	0.47	0.64	0.78
Lophostoma silvicola	MXD	BLOCK	JACCARD	0.83	0.57	0.57	0.68	0.81
	SVM	BLOCK	JACCARD	0.86	0.70	0.70	0.75	0.86
	RDF	BLOCK	JACCARD	0.87	0.69	0.69	0.75	0.86
	GAU	BLOCK	JACCARD	0.87	0.67	0.67	0.74	0.85
	SUP	BLOCK	JACCARD	0.87	0.71	0.71	0.76	0.87
Macrophyllum macrophyllum	MXD	BLOCK	JACCARD	0.72	0.34	0.34	0.59	0.74
	SVM	BLOCK	JACCARD	0.71	0.39	0.39	0.60	0.75
	RDF	BLOCK	JACCARD	0.72	0.40	0.40	0.60	0.75
	GAU	BLOCK	JACCARD	0.71	0.43	0.43	0.63	0.77
	SUP	BLOCK	JACCARD	0.72	0.42	0.42	0.62	0.77
Mesophylla macconnelli	MXD	BLOCK	JACCARD	0.88	0.72	0.72	0.78	0.88
	SVM	BLOCK	JACCARD	0.86	0.62	0.62	0.72	0.84
	RDF	BLOCK	JACCARD	0.87	0.70	0.70	0.76	0.87
	GAU	BLOCK	JACCARD	0.88	0.71	0.71	0.77	0.87
	SUP	BLOCK	JACCARD	0.88	0.72	0.72	0.78	0.87
Micronycteris hirsuta	MXD	BLOCK	JACCARD	0.81	0.63	0.63	0.72	0.84
	SVM	BLOCK	JACCARD	0.71	0.56	0.56	0.69	0.81
	RDF	BLOCK	JACCARD	0.82	0.55	0.55	0.68	0.81
	GAU	BLOCK	JACCARD	0.79	0.67	0.67	0.74	0.85
	SUP	BLOCK	JACCARD	0.81	0.67	0.67	0.74	0.85
Micronycteris megalotis	MXD	BLOCK	JACCARD	0.78	0.41	0.41	0.62	0.76
	SVM	BLOCK	JACCARD	0.74	0.38	0.38	0.59	0.75
	RDF	BLOCK	JACCARD	0.76	0.43	0.43	0.62	0.77
	GAU	BLOCK	JACCARD	0.74	0.39	0.39	0.62	0.76
	SUP	BLOCK	JACCARD	0.78	0.41	0.41	0.62	0.77
Micronycteris microtis	MXD	BLOCK	JACCARD	0.91	0.75	0.75	0.78	0.88
	SVM	BLOCK	JACCARD	0.89	0.71	0.71	0.74	0.85
	RDF	BLOCK	JACCARD	0.90	0.73	0.73	0.77	0.87
	GAU	BLOCK	JACCARD	0.89	0.74	0.74	0.77	0.87
	SUP	BLOCK	JACCARD	0.90	0.75	0.75	0.77	0.87
Micronycteris minuta	MXD	BLOCK	JACCARD	0.71	0.28	0.28	0.58	0.73
	SVM	BLOCK	JACCARD	0.71	0.25	0.25	0.54	0.70
	RDF	BLOCK	JACCARD	0.78	0.41	0.41	0.62	0.76
	GAU	BLOCK	JACCARD	0.72	0.32	0.32	0.59	0.74
	SUP	BLOCK	JACCARD	0.77	0.37	0.37	0.60	0.75
Micronycteris schmidtorum	MXD	BLOCK	JACCARD	0.84	0.59	0.59	0.68	0.81
	SVM	BLOCK	JACCARD	0.84	0.62	0.62	0.71	0.83
	RDF	BLOCK	JACCARD	0.83	0.56	0.56	0.68	0.81
	GAU	BLOCK	JACCARD	0.84	0.59	0.59	0.70	0.83
	SUP	BLOCK	JACCARD	0.85	0.61	0.61	0.71	0.83
Mimon bennettii	MXD	BLOCK	JACCARD	0.72	0.25	0.25	0.57	0.73
	SVM	BLOCK	JACCARD	0.73	0.43	0.43	0.57	0.73
	RDF	BLOCK	JACCARD	0.76	0.45	0.45	0.59	0.74
	GAU	BLOCK	JACCARD	0.68	0.40	0.40	0.58	0.73
	SUP	BLOCK	JACCARD	0.73	0.46	0.46	0.59	0.74
Molossops temminckii	MXD	BLOCK	JACCARD	0.72	0.36	0.36	0.60	0.75
	SVM	BLOCK	JACCARD	0.66	0.21	0.21	0.56	0.71
	RDF	BLOCK	JACCARD	0.67	0.18	0.18	0.55	0.71
	GAU	BLOCK	JACCARD	0.67	0.24	0.24	0.57	0.72
	SUP	BLOCK	JACCARD	0.72	0.36	0.36	0.60	0.75
Molossus coibensis	MXD	BLOCK	JACCARD	0.76	0.47	0.47	0.64	0.78
	SVM	BLOCK	JACCARD	0.74	0.49	0.49	0.65	0.79
	RDF	BLOCK	JACCARD	0.70	0.48	0.48	0.65	0.78
	GAU	BLOCK	JACCARD	0.72	0.53	0.53	0.67	0.80
	SUP	BLOCK	JACCARD	0.72	0.53	0.53	0.67	0.80
Molossus currentium	MXD	BLOCK	JACCARD	0.74	0.49	0.49	0.62	0.76
	SVM	BLOCK	JACCARD	0.72	0.51	0.51	0.64	0.78
	RDF	BLOCK	JACCARD	0.78	0.52	0.52	0.67	0.80
	GAU	BLOCK	JACCARD	0.80	0.60	0.60	0.68	0.81
	SUP	BLOCK	JACCARD	0.80	0.60	0.60	0.68	0.81
Molossus molossus	MXD	BLOCK	JACCARD	0.71	0.25	0.25	0.56	0.72
	SVM	BLOCK	JACCARD	0.70	0.25	0.25	0.56	0.71
	RDF	BLOCK	JACCARD	0.76	0.35	0.35	0.60	0.75
	GAU	BLOCK	JACCARD	0.69	0.29	0.29	0.57	0.73
	SUP	BLOCK	JACCARD	0.75	0.32	0.32	0.58	0.74
Molossus pretiosus	MXD	BLOCK	JACCARD	0.83	0.66	0.66	0.72	0.84
	SVM	BLOCK	JACCARD	0.87	0.65	0.65	0.74	0.85
	RDF	BLOCK	JACCARD	0.86	0.63	0.63	0.71	0.83
	GAU	BLOCK	JACCARD	0.92	0.77	0.77	0.80	0.89
	SUP	BLOCK	JACCARD	0.92	0.77	0.77	0.80	0.89
Molossus rufus	MXD	BLOCK	JACCARD	0.83	0.50	0.50	0.64	0.78
	SVM	BLOCK	JACCARD	0.79	0.31	0.31	0.59	0.74
	RDF	BLOCK	JACCARD	0.81	0.43	0.43	0.61	0.75
	GAU	BLOCK	JACCARD	0.81	0.46	0.46	0.63	0.77
	SUP	BLOCK	JACCARD	0.83	0.47	0.47	0.63	0.77
Myotis albescens	MXD	BLOCK	JACCARD	0.71	0.29	0.29	0.58	0.73
	SVM	BLOCK	JACCARD	0.70	0.31	0.31	0.57	0.72
	RDF	BLOCK	JACCARD	0.70	0.28	0.28	0.57	0.73
	GAU	BLOCK	JACCARD	0.71	0.32	0.32	0.58	0.74
	SUP	BLOCK	JACCARD	0.71	0.32	0.32	0.58	0.73
Myotis levis	MXD	BLOCK	JACCARD	0.89	0.70	0.70	0.76	0.86
	SVM	BLOCK	JACCARD	0.89	0.74	0.74	0.78	0.88
	RDF	BLOCK	JACCARD	0.89	0.65	0.65	0.72	0.84
	GAU	BLOCK	JACCARD	0.90	0.72	0.72	0.77	0.87
	SUP	BLOCK	JACCARD	0.90	0.73	0.73	0.78	0.88
Myotis nigricans	MXD	BLOCK	JACCARD	0.74	0.32	0.32	0.58	0.74
	SVM	BLOCK	JACCARD	0.74	0.35	0.35	0.58	0.73
	RDF	BLOCK	JACCARD	0.76	0.37	0.37	0.59	0.74
	GAU	BLOCK	JACCARD	0.73	0.35	0.35	0.58	0.73
	SUP	BLOCK	JACCARD	0.76	0.35	0.35	0.59	0.74
Myotis riparius	MXD	BLOCK	JACCARD	0.77	0.40	0.40	0.60	0.75
	SVM	BLOCK	JACCARD	0.73	0.36	0.36	0.59	0.74
	RDF	BLOCK	JACCARD	0.80	0.53	0.53	0.67	0.80
	GAU	BLOCK	JACCARD	0.76	0.45	0.45	0.63	0.77
	SUP	BLOCK	JACCARD	0.79	0.49	0.49	0.65	0.79
Noctilio albiventris	MXD	BLOCK	JACCARD	0.74	0.46	0.46	0.64	0.78
	SVM	BLOCK	JACCARD	0.73	0.40	0.40	0.60	0.75
	RDF	BLOCK	JACCARD	0.73	0.39	0.39	0.62	0.76
	GAU	BLOCK	JACCARD	0.75	0.43	0.43	0.63	0.77
	SUP	BLOCK	JACCARD	0.75	0.45	0.45	0.64	0.78
Noctilio leporinus	MXD	BLOCK	JACCARD	0.77	0.35	0.35	0.57	0.73
	SVM	BLOCK	JACCARD	0.72	0.37	0.37	0.57	0.72
	RDF	BLOCK	JACCARD	0.77	0.41	0.41	0.60	0.75
	GAU	BLOCK	JACCARD	0.76	0.37	0.37	0.57	0.73
	SUP	BLOCK	JACCARD	0.77	0.41	0.41	0.60	0.75
Nyctinomops aurispinosus	MXD	BLOCK	JACCARD	0.87	0.69	0.69	0.74	0.85
	SVM	BLOCK	JACCARD	0.84	0.57	0.57	0.66	0.80
	RDF	BLOCK	JACCARD	0.87	0.64	0.64	0.69	0.82
	GAU	BLOCK	JACCARD	0.88	0.63	0.63	0.70	0.82
	SUP	BLOCK	JACCARD	0.90	0.66	0.66	0.74	0.85
Nyctinomops laticaudatus	MXD	BLOCK	JACCARD	0.77	0.40	0.40	0.60	0.75
	SVM	BLOCK	JACCARD	0.77	0.39	0.39	0.58	0.73
	RDF	BLOCK	JACCARD	0.78	0.41	0.41	0.59	0.75
	GAU	BLOCK	JACCARD	0.78	0.38	0.38	0.61	0.75
	SUP	BLOCK	JACCARD	0.79	0.41	0.41	0.60	0.75
Nyctinomops macrotis	MXD	BLOCK	JACCARD	0.82	0.59	0.59	0.69	0.81
	SVM	BLOCK	JACCARD	0.83	0.61	0.61	0.67	0.80
	RDF	BLOCK	JACCARD	0.87	0.68	0.68	0.72	0.84
	GAU	BLOCK	JACCARD	0.83	0.59	0.59	0.66	0.80
	SUP	BLOCK	JACCARD	0.87	0.68	0.68	0.72	0.84
Peropteryx kappleri	MXD	BLOCK	JACCARD	0.80	0.49	0.49	0.65	0.78
	SVM	BLOCK	JACCARD	0.81	0.52	0.52	0.66	0.80
	RDF	BLOCK	JACCARD	0.82	0.66	0.66	0.73	0.84
	GAU	BLOCK	JACCARD	0.81	0.56	0.56	0.69	0.81
	SUP	BLOCK	JACCARD	0.83	0.62	0.62	0.72	0.84
Peropteryx macrotis	MXD	BLOCK	JACCARD	0.69	0.27	0.27	0.58	0.73
	SVM	BLOCK	JACCARD	0.65	0.29	0.29	0.56	0.71
	RDF	BLOCK	JACCARD	0.71	0.32	0.32	0.59	0.74
	GAU	BLOCK	JACCARD	0.65	0.29	0.29	0.57	0.73
	SUP	BLOCK	JACCARD	0.69	0.29	0.29	0.58	0.74
Phylloderma stenops	MXD	BLOCK	JACCARD	0.76	0.40	0.40	0.60	0.75
	SVM	BLOCK	JACCARD	0.75	0.45	0.45	0.63	0.77
	RDF	BLOCK	JACCARD	0.79	0.54	0.54	0.62	0.77
	GAU	BLOCK	JACCARD	0.74	0.44	0.44	0.63	0.77
	SUP	BLOCK	JACCARD	0.79	0.54	0.54	0.62	0.77
Phyllostomus discolor	MXD	BLOCK	JACCARD	0.77	0.38	0.38	0.61	0.76
	SVM	BLOCK	JACCARD	0.76	0.44	0.44	0.61	0.76
	RDF	BLOCK	JACCARD	0.75	0.42	0.42	0.62	0.76
	GAU	BLOCK	JACCARD	0.79	0.40	0.40	0.61	0.76
	SUP	BLOCK	JACCARD	0.77	0.46	0.46	0.62	0.77
Phyllostomus elongatus	MXD	BLOCK	JACCARD	0.84	0.56	0.56	0.69	0.81
	SVM	BLOCK	JACCARD	0.81	0.50	0.50	0.64	0.78
	RDF	BLOCK	JACCARD	0.84	0.60	0.60	0.70	0.83
	GAU	BLOCK	JACCARD	0.83	0.57	0.57	0.70	0.82
	SUP	BLOCK	JACCARD	0.84	0.59	0.59	0.70	0.82
Phyllostomus hastatus	MXD	BLOCK	JACCARD	0.79	0.43	0.43	0.63	0.77
	SVM	BLOCK	JACCARD	0.77	0.46	0.46	0.63	0.78
	RDF	BLOCK	JACCARD	0.82	0.50	0.50	0.64	0.78
	GAU	BLOCK	JACCARD	0.79	0.43	0.43	0.63	0.77
	SUP	BLOCK	JACCARD	0.81	0.46	0.46	0.64	0.78
Platyrrhinus brachycephalus	MXD	BLOCK	JACCARD	0.83	0.64	0.64	0.71	0.83
	SVM	BLOCK	JACCARD	0.79	0.51	0.51	0.65	0.79
	RDF	BLOCK	JACCARD	0.83	0.57	0.57	0.69	0.82
	GAU	BLOCK	JACCARD	0.83	0.62	0.62	0.71	0.83
	SUP	BLOCK	JACCARD	0.83	0.62	0.62	0.71	0.83
Platyrrhinus fusciventris	MXD	BLOCK	JACCARD	0.96	0.91	0.91	0.92	0.96
	SVM	BLOCK	JACCARD	0.93	0.80	0.80	0.83	0.91
	RDF	BLOCK	JACCARD	0.97	0.91	0.91	0.92	0.96
	GAU	BLOCK	JACCARD	0.96	0.82	0.82	0.85	0.92
	SUP	BLOCK	JACCARD	0.97	0.95	0.95	0.95	0.98
Platyrrhinus incarum	MXD	BLOCK	JACCARD	0.85	0.58	0.58	0.69	0.81
	SVM	BLOCK	JACCARD	0.75	0.44	0.44	0.61	0.76
	RDF	BLOCK	JACCARD	0.84	0.62	0.62	0.71	0.83
	GAU	BLOCK	JACCARD	0.82	0.52	0.52	0.68	0.81
	SUP	BLOCK	JACCARD	0.86	0.62	0.62	0.71	0.83
Platyrrhinus infuscus	MXD	BLOCK	JACCARD	0.87	0.68	0.68	0.75	0.86
	SVM	BLOCK	JACCARD	0.85	0.62	0.62	0.71	0.83
	RDF	BLOCK	JACCARD	0.89	0.72	0.72	0.78	0.87
	GAU	BLOCK	JACCARD	0.86	0.68	0.68	0.76	0.86
	SUP	BLOCK	JACCARD	0.88	0.71	0.71	0.77	0.87
Platyrrhinus lineatus	MXD	BLOCK	JACCARD	0.80	0.46	0.46	0.61	0.76
	SVM	BLOCK	JACCARD	0.80	0.47	0.47	0.62	0.77
	RDF	BLOCK	JACCARD	0.83	0.49	0.49	0.64	0.78
	GAU	BLOCK	JACCARD	0.80	0.44	0.44	0.63	0.78
	SUP	BLOCK	JACCARD	0.83	0.51	0.51	0.65	0.79
Promops centralis	MXD	BLOCK	JACCARD	0.78	0.52	0.52	0.63	0.78
	SVM	BLOCK	JACCARD	0.72	0.49	0.49	0.60	0.75
	RDF	BLOCK	JACCARD	0.70	0.39	0.39	0.60	0.75
	GAU	BLOCK	JACCARD	0.78	0.48	0.48	0.64	0.78
	SUP	BLOCK	JACCARD	0.78	0.51	0.51	0.64	0.78
Promops nasutus	MXD	BLOCK	JACCARD	0.61	0.19	0.19	0.55	0.71
	SVM	BLOCK	JACCARD	0.64	0.14	0.14	0.54	0.70
	RDF	BLOCK	JACCARD	0.59	0.17	0.17	0.53	0.69
	GAU	BLOCK	JACCARD	0.61	0.14	0.14	0.54	0.70
	SUP	BLOCK	JACCARD	0.60	0.21	0.21	0.56	0.72
Pteronotus gymnonotus	MXD	BLOCK	JACCARD	0.67	0.39	0.39	0.61	0.76
	SVM	BLOCK	JACCARD	0.62	0.30	0.30	0.55	0.71
	RDF	BLOCK	JACCARD	0.69	0.39	0.39	0.61	0.76
	GAU	BLOCK	JACCARD	0.68	0.34	0.34	0.60	0.75
	SUP	BLOCK	JACCARD	0.68	0.37	0.37	0.61	0.76
Pteronotus personatus	MXD	BLOCK	JACCARD	0.95	0.80	0.80	0.81	0.89
	SVM	BLOCK	JACCARD	0.94	0.79	0.79	0.81	0.89
	RDF	BLOCK	JACCARD	0.94	0.80	0.80	0.81	0.90
	GAU	BLOCK	JACCARD	0.95	0.80	0.80	0.82	0.90
	SUP	BLOCK	JACCARD	0.95	0.82	0.82	0.83	0.91
Pteronotus rubiginosus	MXD	BLOCK	JACCARD	0.72	0.31	0.31	0.58	0.73
	SVM	BLOCK	JACCARD	0.80	0.52	0.52	0.67	0.80
	RDF	BLOCK	JACCARD	0.76	0.41	0.41	0.61	0.76
	GAU	BLOCK	JACCARD	0.81	0.55	0.55	0.66	0.80
	SUP	BLOCK	JACCARD	0.82	0.63	0.63	0.72	0.84
Pygoderma bilabiatum	MXD	BLOCK	JACCARD	0.83	0.69	0.69	0.76	0.86
	SVM	BLOCK	JACCARD	0.85	0.68	0.68	0.75	0.86
	RDF	BLOCK	JACCARD	0.86	0.76	0.76	0.80	0.89
	GAU	BLOCK	JACCARD	0.82	0.66	0.66	0.74	0.85
	SUP	BLOCK	JACCARD	0.86	0.76	0.76	0.80	0.89
Rhinophylla fischerae	MXD	BLOCK	JACCARD	0.82	0.57	0.57	0.68	0.81
	SVM	BLOCK	JACCARD	0.84	0.65	0.65	0.73	0.85
	RDF	BLOCK	JACCARD	0.82	0.59	0.59	0.71	0.83
	GAU	BLOCK	JACCARD	0.84	0.65	0.65	0.73	0.85
	SUP	BLOCK	JACCARD	0.85	0.69	0.69	0.75	0.86
Rhinophylla pumilio	MXD	BLOCK	JACCARD	0.84	0.54	0.54	0.68	0.81
	SVM	BLOCK	JACCARD	0.83	0.57	0.57	0.67	0.80
	RDF	BLOCK	JACCARD	0.85	0.54	0.54	0.68	0.81
	GAU	BLOCK	JACCARD	0.83	0.56	0.56	0.68	0.81
	SUP	BLOCK	JACCARD	0.84	0.51	0.51	0.67	0.80
Rhogeessa io	MXD	BLOCK	JACCARD	0.97	0.95	0.95	0.95	0.97
	SVM	BLOCK	JACCARD	0.95	0.82	0.82	0.85	0.92
	RDF	BLOCK	JACCARD	0.96	0.90	0.90	0.91	0.95
	GAU	BLOCK	JACCARD	0.97	0.92	0.92	0.93	0.96
	SUP	BLOCK	JACCARD	0.97	0.92	0.92	0.93	0.96
Rhynchonycteris naso	MXD	BLOCK	JACCARD	0.82	0.56	0.56	0.68	0.81
	SVM	BLOCK	JACCARD	0.81	0.58	0.58	0.69	0.81
	RDF	BLOCK	JACCARD	0.83	0.56	0.56	0.67	0.81
	GAU	BLOCK	JACCARD	0.83	0.57	0.57	0.68	0.81
	SUP	BLOCK	JACCARD	0.83	0.58	0.58	0.69	0.81
Saccopteryx bilineata	MXD	BLOCK	JACCARD	0.89	0.61	0.61	0.71	0.83
	SVM	BLOCK	JACCARD	0.87	0.63	0.63	0.72	0.83
	RDF	BLOCK	JACCARD	0.87	0.58	0.58	0.69	0.82
	GAU	BLOCK	JACCARD	0.90	0.64	0.64	0.72	0.84
	SUP	BLOCK	JACCARD	0.89	0.65	0.65	0.72	0.84
Saccopteryx canescens	MXD	BLOCK	JACCARD	0.94	0.80	0.80	0.82	0.90
	SVM	BLOCK	JACCARD	0.89	0.77	0.77	0.79	0.88
	RDF	BLOCK	JACCARD	0.95	0.83	0.83	0.85	0.92
	GAU	BLOCK	JACCARD	0.93	0.77	0.77	0.80	0.89
	SUP	BLOCK	JACCARD	0.97	0.85	0.85	0.86	0.93
Saccopteryx leptura	MXD	BLOCK	JACCARD	0.80	0.51	0.51	0.66	0.80
	SVM	BLOCK	JACCARD	0.78	0.49	0.49	0.64	0.78
	RDF	BLOCK	JACCARD	0.80	0.52	0.52	0.65	0.79
	GAU	BLOCK	JACCARD	0.82	0.50	0.50	0.66	0.79
	SUP	BLOCK	JACCARD	0.81	0.56	0.56	0.68	0.81
Sphaeronycteris toxophyllum	MXD	BLOCK	JACCARD	0.96	0.83	0.83	0.84	0.91
	SVM	BLOCK	JACCARD	0.90	0.65	0.65	0.75	0.85
	RDF	BLOCK	JACCARD	0.97	0.83	0.83	0.85	0.92
	GAU	BLOCK	JACCARD	0.96	0.83	0.83	0.85	0.92
	SUP	BLOCK	JACCARD	0.97	0.83	0.83	0.85	0.92
Sturnira giannae	MXD	BLOCK	JACCARD	0.66	0.38	0.38	0.59	0.74
	SVM	BLOCK	JACCARD	0.62	0.31	0.31	0.57	0.73
	RDF	BLOCK	JACCARD	0.74	0.48	0.48	0.66	0.80
	GAU	BLOCK	JACCARD	0.74	0.60	0.60	0.71	0.83
	SUP	BLOCK	JACCARD	0.74	0.59	0.59	0.71	0.83
Sturnira lilium	MXD	BLOCK	JACCARD	0.71	0.30	0.30	0.57	0.73
	SVM	BLOCK	JACCARD	0.69	0.30	0.30	0.57	0.73
	RDF	BLOCK	JACCARD	0.77	0.39	0.39	0.61	0.75
	GAU	BLOCK	JACCARD	0.69	0.33	0.33	0.59	0.74
	SUP	BLOCK	JACCARD	0.74	0.38	0.38	0.61	0.76
Sturnira magna	MXD	BLOCK	JACCARD	0.94	0.86	0.86	0.87	0.93
	SVM	BLOCK	JACCARD	0.90	0.73	0.73	0.78	0.88
	RDF	BLOCK	JACCARD	0.93	0.79	0.79	0.82	0.90
	GAU	BLOCK	JACCARD	0.92	0.78	0.78	0.81	0.90
	SUP	BLOCK	JACCARD	0.95	0.82	0.82	0.84	0.92
Sturnira tildae	MXD	BLOCK	JACCARD	0.86	0.61	0.61	0.71	0.83
	SVM	BLOCK	JACCARD	0.85	0.62	0.62	0.70	0.82
	RDF	BLOCK	JACCARD	0.88	0.65	0.65	0.72	0.84
	GAU	BLOCK	JACCARD	0.86	0.60	0.60	0.70	0.82
	SUP	BLOCK	JACCARD	0.88	0.65	0.65	0.72	0.84
Tadarida brasiliensis	MXD	BLOCK	JACCARD	0.85	0.55	0.55	0.67	0.80
	SVM	BLOCK	JACCARD	0.87	0.64	0.64	0.71	0.83
	RDF	BLOCK	JACCARD	0.86	0.60	0.60	0.70	0.82
	GAU	BLOCK	JACCARD	0.87	0.63	0.63	0.71	0.83
	SUP	BLOCK	JACCARD	0.87	0.65	0.65	0.71	0.83
Thyroptera tricolor	MXD	BLOCK	JACCARD	0.80	0.52	0.52	0.67	0.80
	SVM	BLOCK	JACCARD	0.75	0.49	0.49	0.62	0.77
	RDF	BLOCK	JACCARD	0.81	0.50	0.50	0.66	0.79
	GAU	BLOCK	JACCARD	0.81	0.55	0.55	0.68	0.81
	SUP	BLOCK	JACCARD	0.80	0.56	0.56	0.68	0.81
Tonatia bidens	MXD	BLOCK	JACCARD	0.69	0.28	0.28	0.57	0.73
	SVM	BLOCK	JACCARD	0.60	0.30	0.30	0.56	0.72
	RDF	BLOCK	JACCARD	0.67	0.26	0.26	0.57	0.73
	GAU	BLOCK	JACCARD	0.60	0.35	0.35	0.59	0.74
	SUP	BLOCK	JACCARD	0.60	0.35	0.35	0.59	0.74
Trachops cirrhosus	MXD	BLOCK	JACCARD	0.74	0.37	0.37	0.61	0.76
	SVM	BLOCK	JACCARD	0.78	0.47	0.47	0.62	0.77
	RDF	BLOCK	JACCARD	0.77	0.42	0.42	0.62	0.77
	GAU	BLOCK	JACCARD	0.79	0.47	0.47	0.63	0.78
	SUP	BLOCK	JACCARD	0.79	0.46	0.46	0.64	0.78
Trinycteris nicefori	MXD	BLOCK	JACCARD	0.79	0.59	0.59	0.70	0.82
	SVM	BLOCK	JACCARD	0.74	0.34	0.34	0.59	0.74
	RDF	BLOCK	JACCARD	0.74	0.50	0.50	0.64	0.78
	GAU	BLOCK	JACCARD	0.80	0.60	0.60	0.70	0.82
	SUP	BLOCK	JACCARD	0.80	0.60	0.60	0.71	0.83
Uroderma bilobatum	MXD	BLOCK	JACCARD	0.83	0.57	0.57	0.69	0.82
	SVM	BLOCK	JACCARD	0.81	0.57	0.57	0.68	0.81
	RDF	BLOCK	JACCARD	0.82	0.56	0.56	0.69	0.82
	GAU	BLOCK	JACCARD	0.82	0.57	0.57	0.69	0.82
	SUP	BLOCK	JACCARD	0.82	0.56	0.56	0.69	0.81
Uroderma magnirostrum	MXD	BLOCK	JACCARD	0.80	0.48	0.48	0.64	0.78
	SVM	BLOCK	JACCARD	0.75	0.43	0.43	0.63	0.77
	RDF	BLOCK	JACCARD	0.76	0.41	0.41	0.63	0.77
	GAU	BLOCK	JACCARD	0.79	0.49	0.49	0.66	0.79
	SUP	BLOCK	JACCARD	0.80	0.50	0.50	0.66	0.80
Vampyressa pusilla	MXD	BLOCK	JACCARD	0.76	0.39	0.39	0.58	0.74
	SVM	BLOCK	JACCARD	0.70	0.29	0.29	0.57	0.72
	RDF	BLOCK	JACCARD	0.76	0.48	0.48	0.62	0.77
	GAU	BLOCK	JACCARD	0.75	0.44	0.44	0.59	0.74
	SUP	BLOCK	JACCARD	0.77	0.47	0.47	0.62	0.76
Vampyressa thyone	MXD	BLOCK	JACCARD	0.92	0.65	0.65	0.74	0.85
	SVM	BLOCK	JACCARD	0.89	0.67	0.67	0.74	0.85
	RDF	BLOCK	JACCARD	0.95	0.76	0.76	0.80	0.89
	GAU	BLOCK	JACCARD	0.94	0.75	0.75	0.78	0.88
	SUP	BLOCK	JACCARD	0.95	0.76	0.76	0.80	0.89
Vampyriscus bidens	MXD	BLOCK	JACCARD	0.85	0.68	0.68	0.75	0.86
	SVM	BLOCK	JACCARD	0.82	0.61	0.61	0.69	0.82
	RDF	BLOCK	JACCARD	0.89	0.77	0.77	0.81	0.89
	GAU	BLOCK	JACCARD	0.89	0.73	0.73	0.77	0.87
	SUP	BLOCK	JACCARD	0.89	0.75	0.75	0.80	0.89
Vampyrodes caraccioli	MXD	BLOCK	JACCARD	0.76	0.47	0.47	0.64	0.78
	SVM	BLOCK	JACCARD	0.68	0.30	0.30	0.57	0.73
	RDF	BLOCK	JACCARD	0.74	0.39	0.39	0.61	0.76
	GAU	BLOCK	JACCARD	0.73	0.45	0.45	0.64	0.78
	SUP	BLOCK	JACCARD	0.75	0.46	0.46	0.65	0.79
Vampyrum spectrum	MXD	BLOCK	JACCARD	0.80	0.63	0.63	0.73	0.84
	SVM	BLOCK	JACCARD	0.79	0.63	0.63	0.71	0.83
	RDF	BLOCK	JACCARD	0.80	0.63	0.63	0.73	0.84
	GAU	BLOCK	JACCARD	0.83	0.66	0.66	0.75	0.85
	SUP	BLOCK	JACCARD	0.83	0.66	0.66	0.75	0.85
